# Supplementary material for: In vivo treatment of tyrosinaemia with hypercompact Cas12f1
Source: PubMed Central journal article supplement (PMC10352374; doi:10.1038/s41421-023-00554-y), 2023-07-18
Supplement: 41421_2023_554_MOESM1_ESM.pdf [file 41421_2023_554_MOESM1_ESM.pdf]

Supplementary materials for

## **In vivo treatment of tyrosinaemia with hypercompact Cas12f1**

Ruochen Guo<sup>1,2†</sup>, Zhifang Li<sup>1,3†</sup>, Guoling Li<sup>2†</sup>, Hainan Zhang<sup>4†</sup>, Chang Zhang<sup>2†</sup>, Xiaona Huo<sup>1,3</sup>, Xiaoyin Zhang<sup>1,3</sup>, Xiali Yang<sup>2</sup>, Rongrong Yang<sup>1,3</sup>, Yuanhua Liu<sup>2</sup>, Xiaozhi Sun<sup>1,5</sup>, Xinyu Liu<sup>2</sup>, Hui Yang<sup>2,3,4\*</sup>, Yingsi Zhou<sup>4\*</sup>, Chunlong Xu<sup>1,3,5\*</sup>

**†These authors contributed equally to this work.**

**\*Corresponding author Email:** [huiyang@huidagene.com](mailto:huiyang@huidagene.com);

[yingsizhou@huidagene.com](mailto:yingsizhou@huidagene.com); [xucl@lglab.ac.cn](mailto:xucl@lglab.ac.cn)

### **This PDF file includes:**

Materials and Methods

Figure S1 Genotyping results for offspring from Cas12f1-edited mouse embryos.

Figure S2 On-target editing analysis of Hpd gene for mouse liver DNA after Un1Cas12f1 treatment.

Figure S3 On-target editing analysis of Hpd gene for mouse liver DNA after CjCas9 treatment.

Figure S4 H&E analysis of liver for Cas12f1 and CjCas9-treated mice.

Figure S5 Phenotypic evaluation of Cas12f1-treated Fah<sup>-/-</sup> mice.

Figure S6 Klkb1 knockout via Cas12f1.

Figure S7 Off-target analysis of predicted off-target loci after Un1Cas12f1 treatment.

Figure S8 Off-target analysis of predicted off-target loci after CjCas9 treatment.

Figure S9 Off-target analysis of predicted off-target loci after Klkb1 editing by Un1Cas12f1.

Figure S10 Genome-wide off-target analysis for Un1Cas12f1 with PEM-seq.

Table S1 Summary table of gRNA tested with or without editing activity for three different Cas12f1 orthologs

Table S2-7 gRNA and primer sequence

## **Materials and Methods**

### **Study approval**

The objectives of the present study were to show proof-of-concept evidence for in vivo therapeutic efficacy of Cas12f1 delivered by AAV. All animal experiments were approved by the Animal Care and Use Committee of Shanghai Center for Brain Science and Brain-Inspired Technology, Shanghai, China.

### **Plasmid constructions**

The pCAG-Un1Cas12f1-hU6-Bpil plasmid encoded a human codon-optimized Un1Cas12f1 driven by CAG promoter, and hU6-driven crRNAs with *Bpil* cloning site. The sgRNAs were designed suitable for Un1Cas12f1 and CjCas9, then synthesized as DNA oligonucleotides and cloned into pCAG-Un1Cas12f1 to form the CRISPR targeting plasmids (listed in Supplementary Tables S2-7).

### **Cell culture, transfection and flow cytometry analysis**

HEK293T were maintained in Dulbecco's modified eagle medium (DMEM) (Gibco, 11965092) supplemented with 10% fetal bovine serum at 37 °C and 5% CO<sub>2</sub> in a humidified incubator. For sgRNA screening, CRISPR targeting plasmids and reporter were co-transfected using polyethylenimine (PEI) transfection reagent. After transfected cells were cultured with 48 hours, we carefully resuspended the cell pellet, and then analyzed or sorted by BD FACSAria II. Flow cytometry results were analyzed with FlowJo X (v.10.0.7).

### **In vitro transcription of Un1Cas12f1 and sgRNA**

Un1Cas12f1 mRNA was transcribed using the mMESSAGING mMACHINE T7 Ultra Kit (Invitrogen, AM1345). T7 promoter was added to sgRNA template by PCR amplification of pCX1991 using primer F and R. The PCR products purified with Omega gel extraction Kit (Omega, D2500-02), templates were

transcribed using the MEGAshortscript Kit(Invitrogen, AM1354). The un1Cas12f1 mRNA and sgRNAs were purified by MEGAclean Kit(Invitrogen, AM1908), eluted with RNase-free water and stored at -80°C.

### **Zygote injection and embryo transplantation**

Eight-week-old B6D2F1 female mice were super ovulated and mate with B6D2F1 male mice, and fertilized embryos were collected from oviduct. The mixture of un1Cas12f1 mRNA(100ng/μl) and sgRNA(100ng/μl) was injected into the cytoplasm of fertilized eggs using a FemtoJet microinjector(Eppendorf). The injected embryos were cultured in KOSM medium with amino acids at 37°C under 5% CO<sub>2</sub> in a humidified incubator overnight and then transferred into oviducts of pseudo-pregnant ICR foster mothers at 0.5-d.p.c.

### **Mice and hydrodynamic injection**

All animal study protocols were approved by the National Institutes of Health (NIH) Guide for the Care and Use of Laboratory Animals. Fahmut/mut mice were kept on 10mg/L NTBC (Sigma-Aldrich, Cat. No. PHR1731) in drinking water when indicated. For hydrodynamic liver injection, AAV8 ( $4 \times 10^{11}$  vg/mouse) in 200 μl saline were injected via the tail vein into 8-10 weeks old male and female mice. Mice were kept off NTBC water at 7 days post injection, and their body weights were recorded every 3-5 days. Mice were harvested at 75 days after NTBC water withdrawal for histology and DNA analysis. Control mice off NTBC water were harvested when reaching >20% weight loss.

### **AAV virus production**

The adeno-associated virus 8 (AAV8) serotype was used in this study. The Cas12f1 or Cjcas9 plasmids with target or nontarget gRNA was sequenced before packaging into AAV8 vehicle, and the AAV vectors were packaged by

PackGene Biotech. The virus titer was  $2.57 \times 10^{13}$  (Ad-Cas12f1-Hpd),  $2.32 \times 10^{13}$  (Ad-Cas12f1-Null),  $2.62 \times 10^{13}$  (Ad-CjCas9-Hpd) and  $1.93 \times 10^{13}$  (Ad-CjCas9-Null) genome copies/ml as determined by qPCR specific for the inverted terminal repeat.

### **Histological analysis and Serum biochemistry**

Liver tissues were harvested, and sections were fixed in 4% PFA overnight. The following antibodies were used: anti-HPD antibody (SantaCruz, sc-390279; dilution 1:100), anti-P21 antibody (Abcam, ab109199; dilution 1:200). Immunohistochemistry, immunofluorescence and hematoxylin and eosin (H&E) staining were performed by the standard procedures. Blood was collected using retro-orbital puncture before mice was sacrificed. ALT, AST, ALB, tyrosine and bilirubin levels in serum were determined using diagnostic ELISA Kits (Abcam, HWRK chem).

### **Targeted deep sequencing**

To analyze un1Cas12f1 targeting efficiency, the DNA of successfully transfected cells or AAV8 treatment tissues were extracted with TIANamp Genomic DNA Kit(TIANGEN,) according to the manufacturer protocol. DNA was amplified with Phanta max super-fidelity DNA polymerase (Vazyme, P505-d1) for Sanger or deep sequencing methods. And deep sequencing libraries were used to add Illumina flow cell binding sequences and specific barcodes on the 5' and 3' end of the primer sequence. The products were pooled and sequenced with 150 paired-end reads on an Illumina Hiseq instrument. FASTQ format data were analyzed using the Cutadapt (v.2.8)41 according to assigned barcode sequences.

### **PEM-seq analysis**

Genome-wide off-target analysis was performed following PEM-seq protocol previously described<sup>12</sup>. The 20  $\mu$ g genomic DNA from Un1Cas12f1 edited or

control samples were fragmented with Covaris sonicator to generate 300-700 bp DNA. DNA fragments was tagged with biotin at 5'-end by one-round PCR extension using a biotinylated primer, primer leftover removed by AMPure XP beads and purified by streptavidin beads. The single-stranded DNA on streptavidin beads is ligated with a bridge adapter containing 14-bp random molecular barcode, and PCR product was generated via nested PCR to enrich DNA fragment containing the bait DSB events and tagged with illumine adapter sequences. The prepared sequencing library was sequenced by Hi-seq 2500 with 150 bp pair-end reads.

### **Statistical analysis**

The number of independent biological replicates were shown in the figure legend. The data are presented as means  $\pm$  SEM. Differences were assessed using unpaired two-tailed Student's *t* tests. Differences in means were considered statistically significant at  $P < 0.05$ .

Figure S1

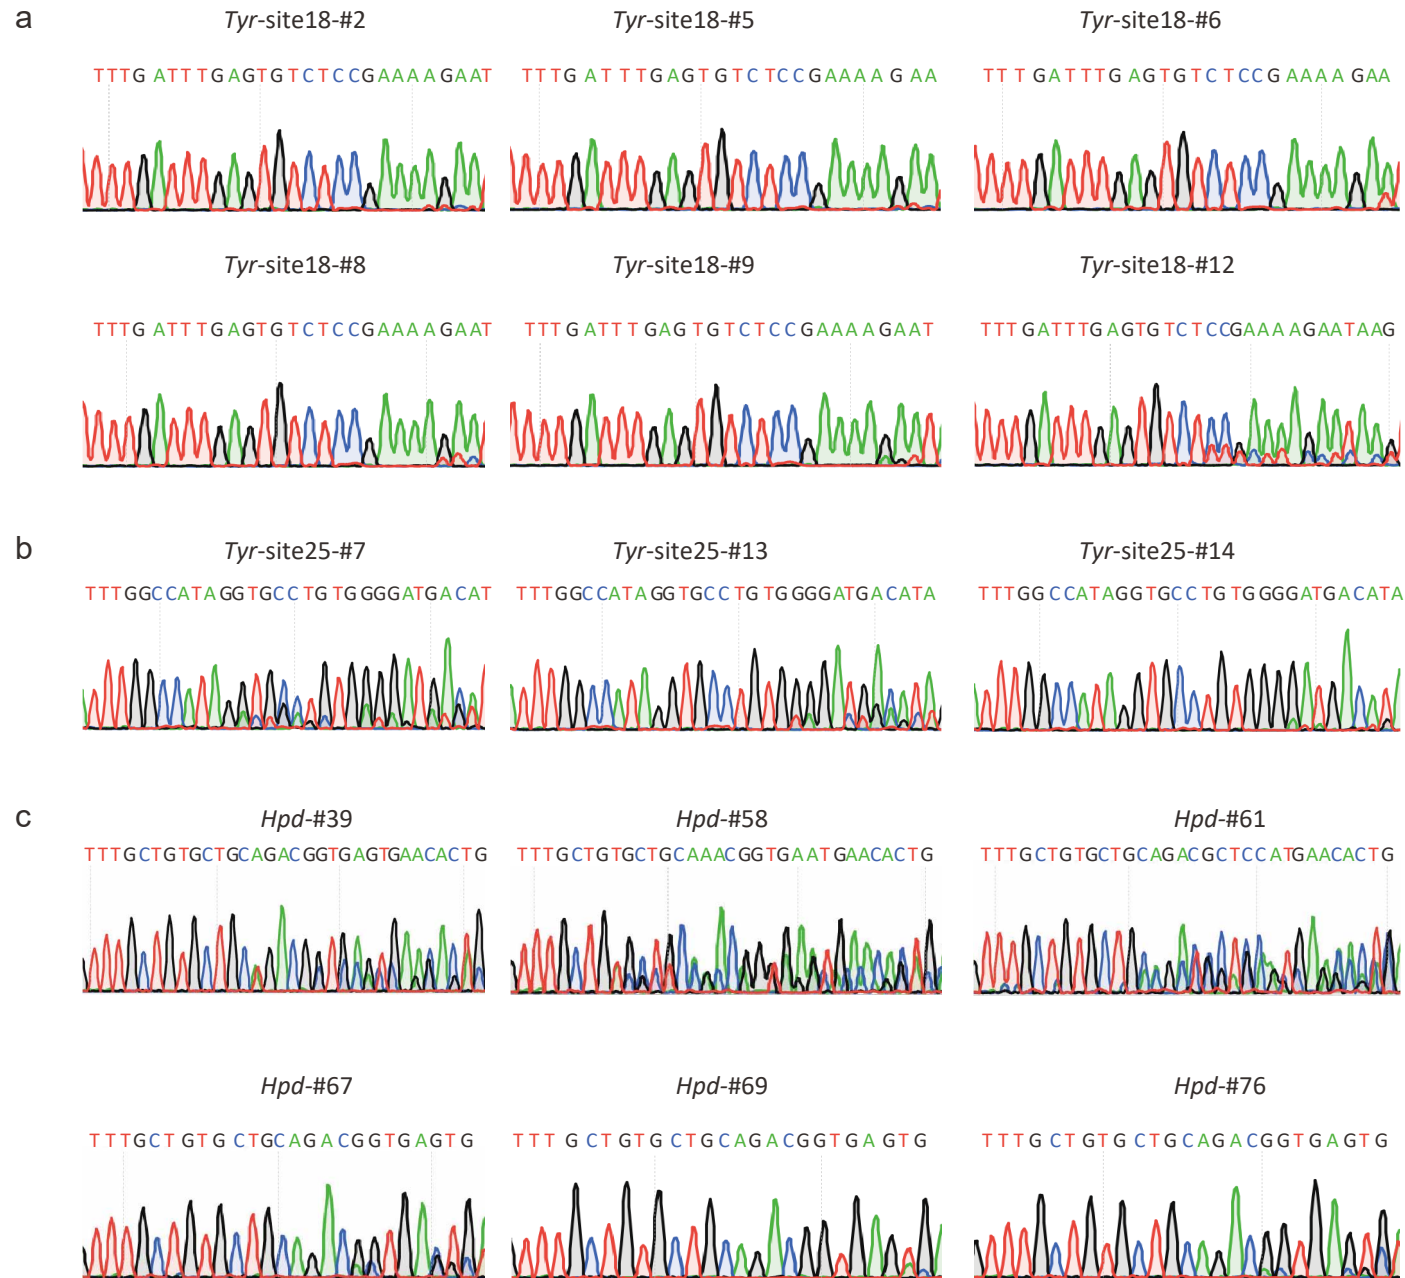

## Supplementary figures & legend

### **Fig. S1 Genotyping results for offspring from Cas12f1-edited mouse**

**embryos. a** Sanger sequencing results for site 18 in *Tyr* gene of offspring derived from Cas12f1-injected embryos. **b** Sanger sequencing results for site-25 in *Tyr* gene of offspring derived from Cas12f1-injected embryos. **c** Sanger sequencing results for site-39 in *Hpd* gene of offspring derived from Cas12f1-injected embryos.





**Fig. S2 On-target editing analysis of *Hpd* gene for mouse liver DNA after Un1Cas12f1 treatment. a-c** Deep-seq results for *Hpd* gene editing in three Un1Cas12f1-treated mice. **d** Percentage of Indel mutations induced by AAV-Un1Cas12f1 in three mice.



**Fig. S3 On-target editing analysis of *Hpd* gene for mouse liver DNA after CjCas9 treatment. a-d** Deep-seq results for *Hpd* gene editing in four CjCas9-treated mice. **e** Percentage of Indel mutations induced by AAV- CjCas9 in four mice.

Figure S4

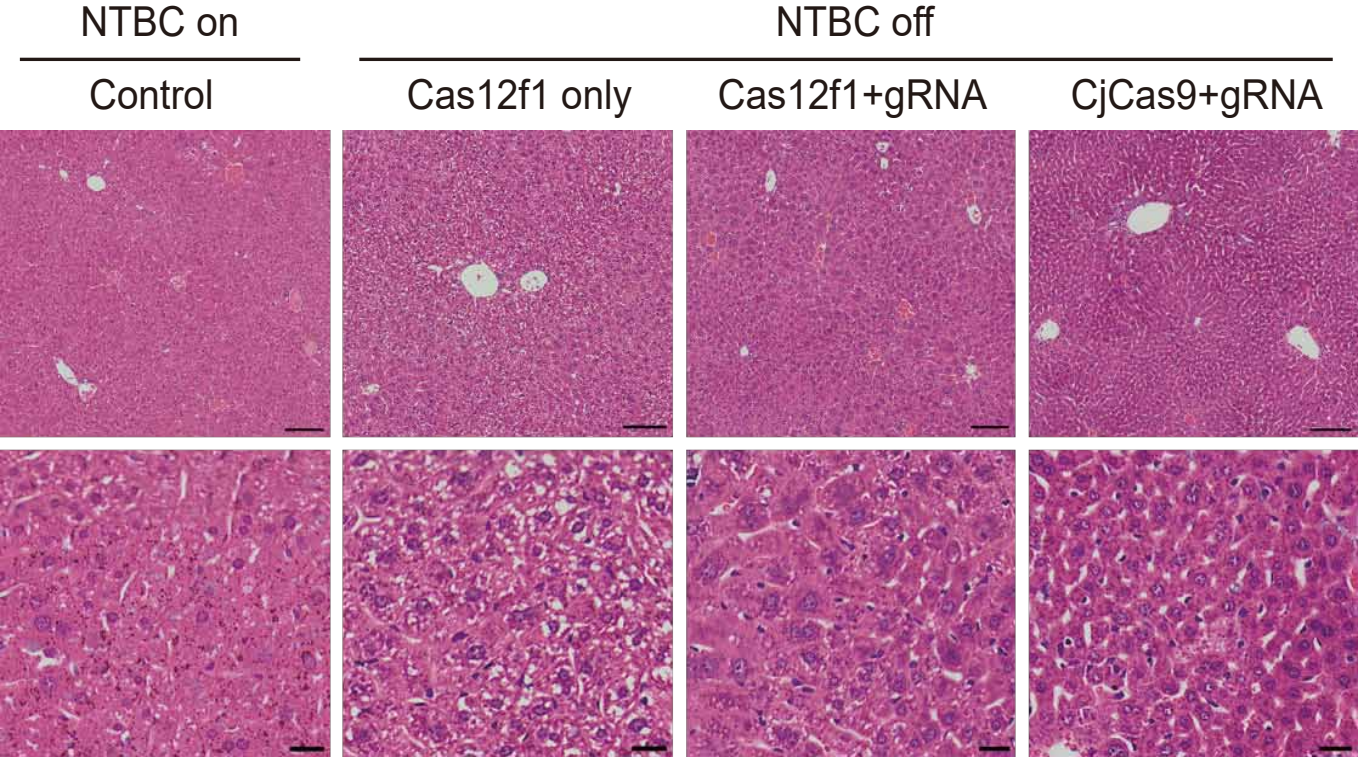

**Fig. S4 H&E analysis of liver for Cas12f1 and CjCas9-treated mice.**

Control represents liver from mice maintained with NTBC and without treatment. Cas12f1 only group indicate liver from mice treated with Cas12f1 and non-target RNA. Cas12f1 + gRNA and CjCas9 + gRNA represent liver from mice treated with Cas protein and gRNA against *Hpd* gene.

Figure S5

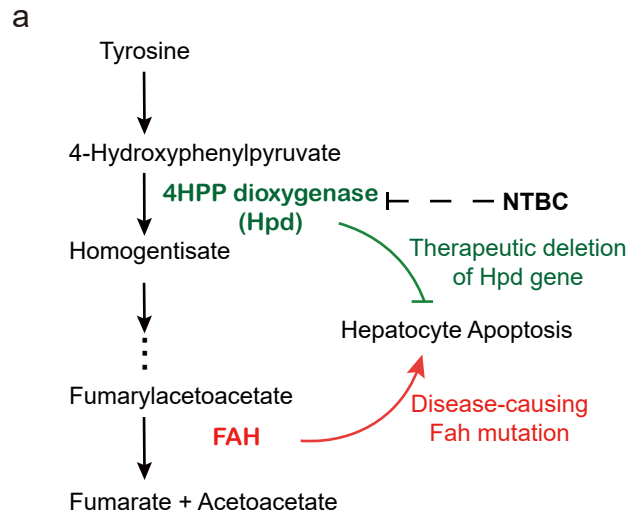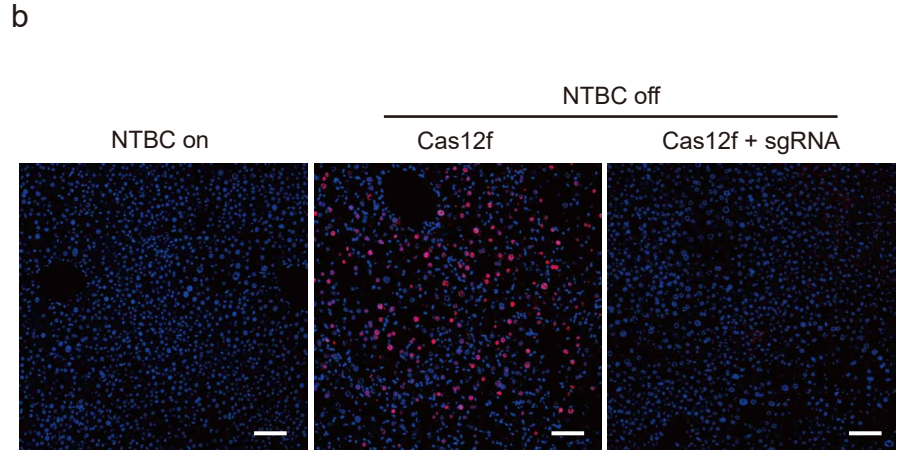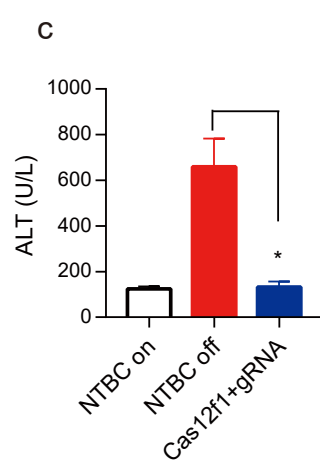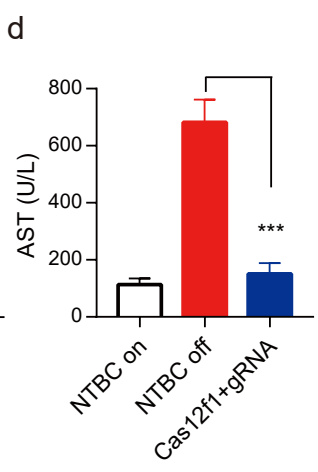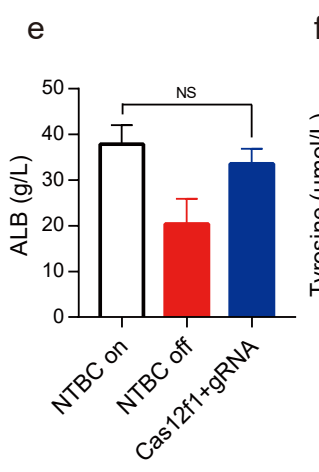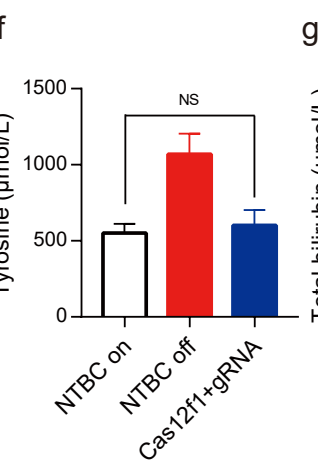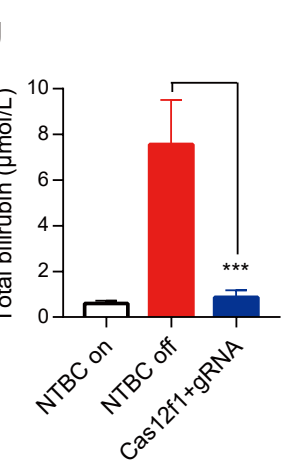

**Fig. S5 Phenotypic evaluation of Cas12f1-treated Fah<sup>-/-</sup> mice.** **a** Tyrosine metabolism pathway. **b** P21 staining results for mouse liver with or without Cas12f1 treatment (30 days post NTBC off). Red and blue indicate P21 and DAPI signal respectively. **c-f** Biochemical analysis of serum indicators for liver metabolic function in Cas12f1-treated or untreated mice (n=3). Liver damage markers aspartate aminotransferase (AST), alanine aminotransferase (ALT), Albumin (ALB), bilirubin and tyrosine were measured in peripheral blood from Fah<sup>-/-</sup> mice injected with Cas12f without or with gRNA (NTBC off, day 30). Fah<sup>-/-</sup> mice on NTBC water (NTBC on) served as a control. Data are represented as means  $\pm$  SEM. Unpaired two-tailed Student's t tests. \* P < 0.05, \*\*\* P < 0.001, NS non-significant. Scale bars, 100  $\mu$ m.

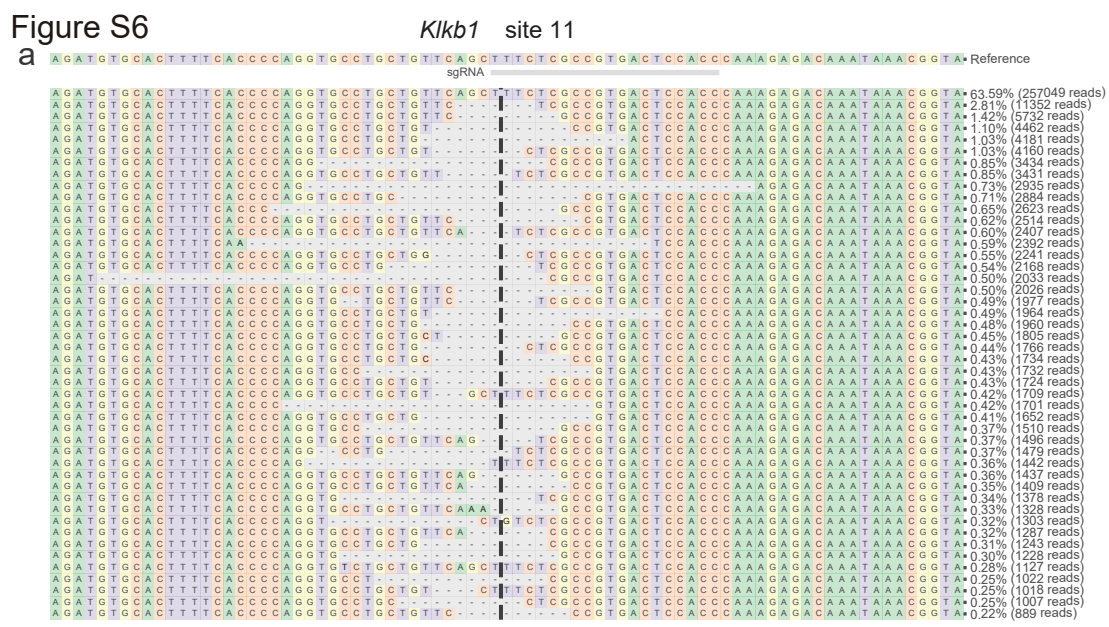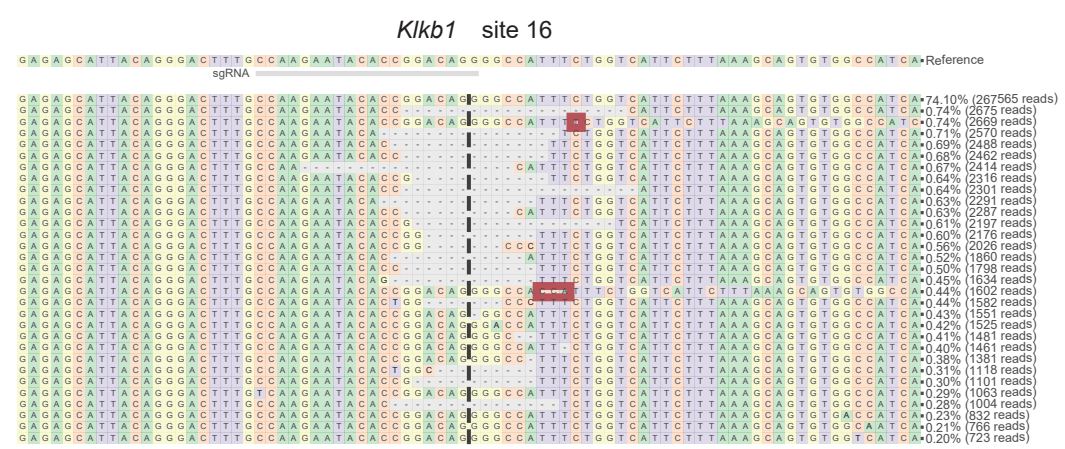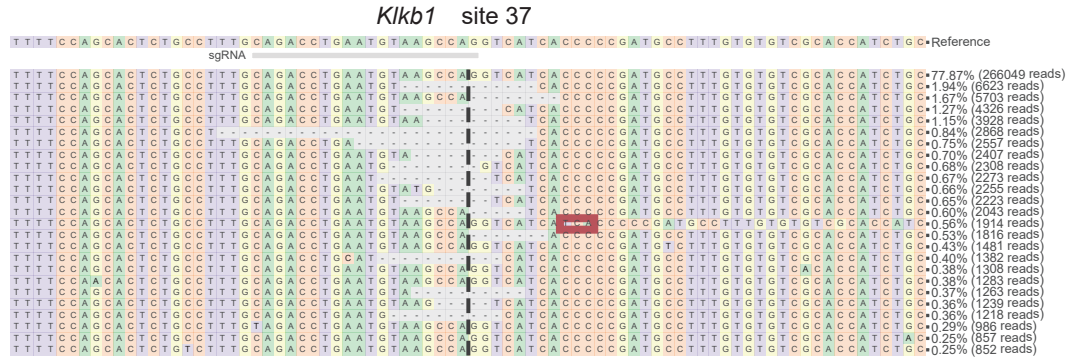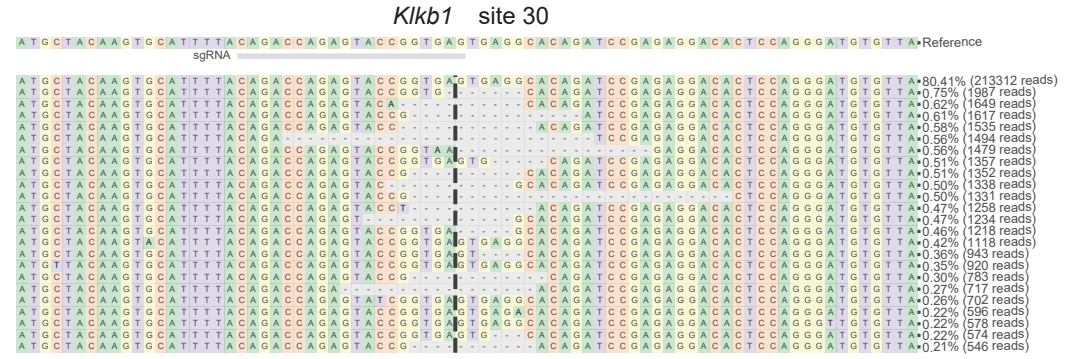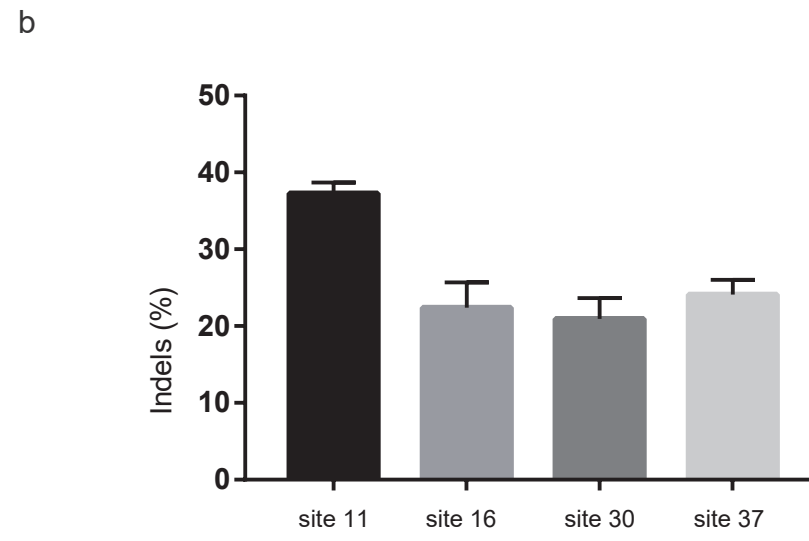



**Fig. S6 Klkb1 knockout via Cas12f1. a** Indel mutations for Klkb1 knockout by Cas12f1. **b** Knockout efficiency for Klkb1.

Figure S7

Off-target analysis for Un1Cas12f1-edited liver

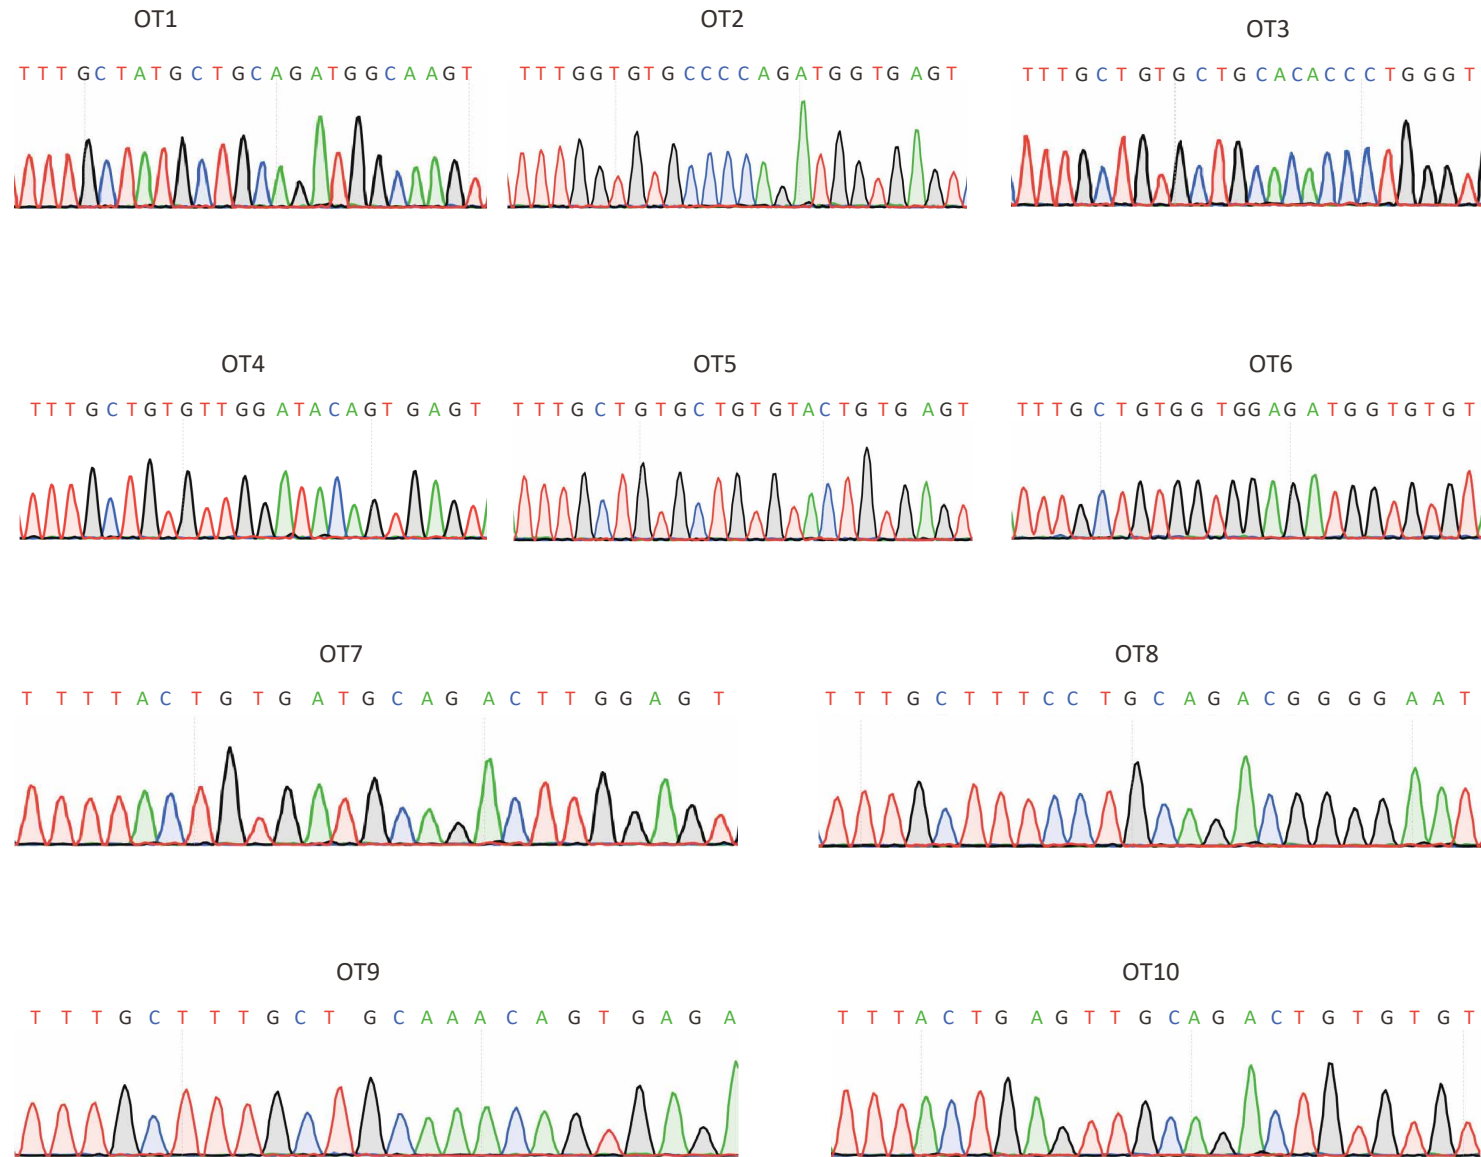

**Fig. S7 Off-target analysis of predicted off-target loci after Un1Cas12f1 treatment.** Sanger sequencing results were shown for top 10 off-target loci (OT1 to OT10) predicted by OFFinder. OT: off-target.

Figure S8

Off-target analysis for CjCas9-edited liver

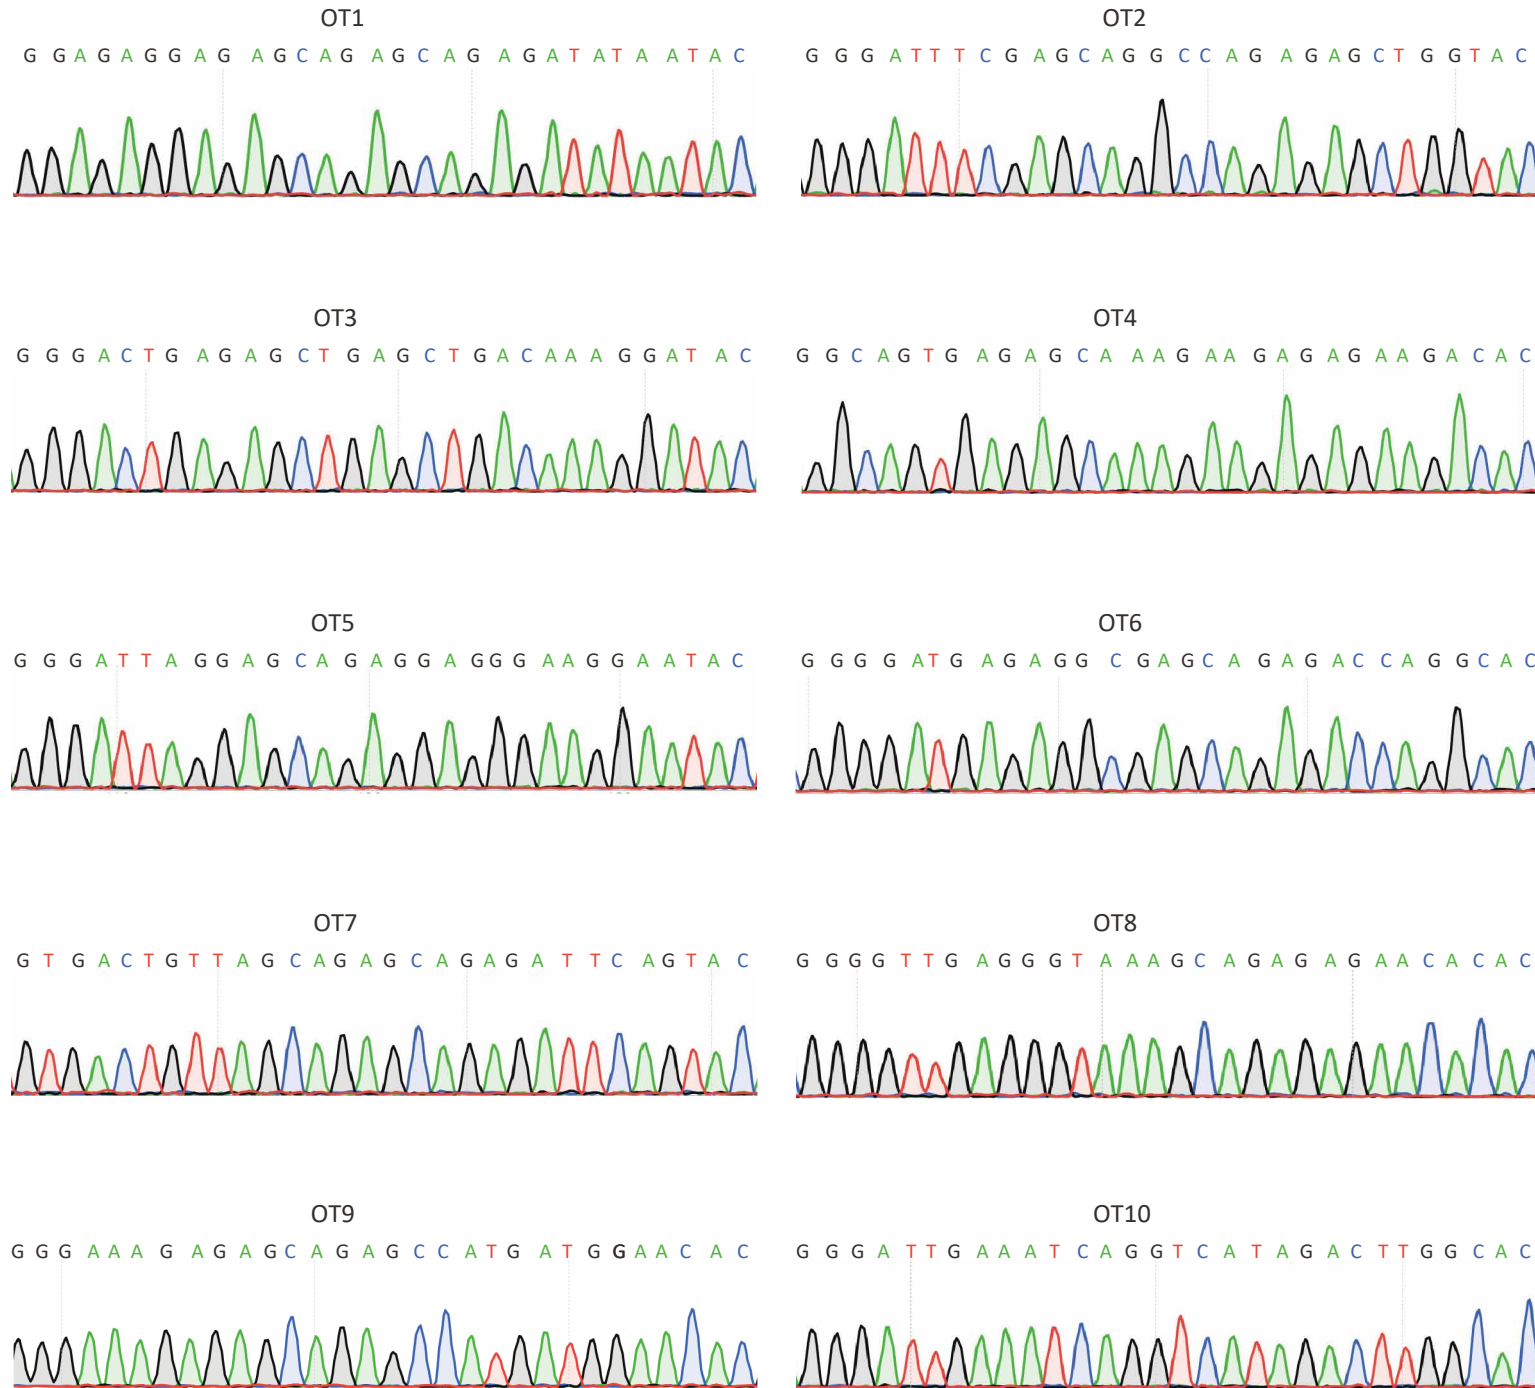

**Fig. S8 Off-target analysis of predicted off-target loci after CjCas9 treatment.** Sanger sequencing results were shown for top 10 off-target loci (OT1 to OT10) predicted by OFFinder. OT: off-target.

Figure S9

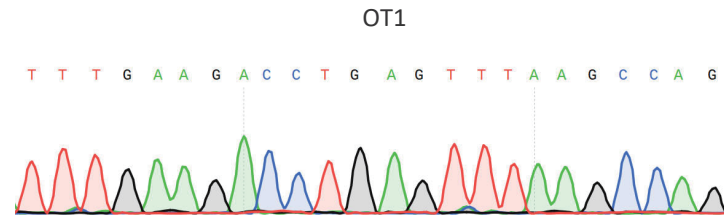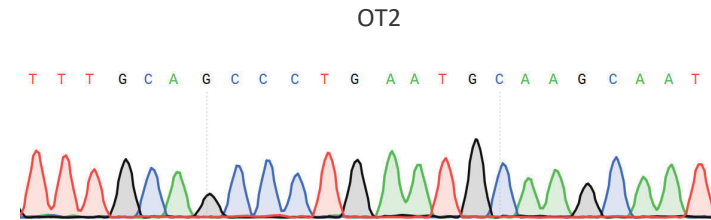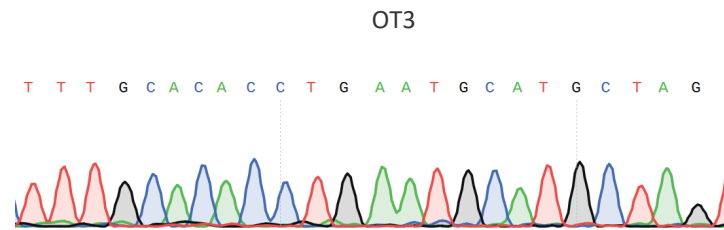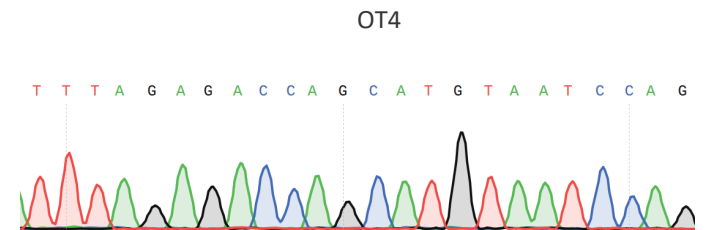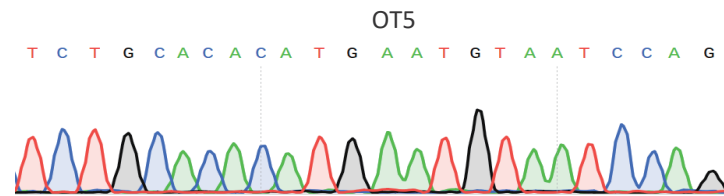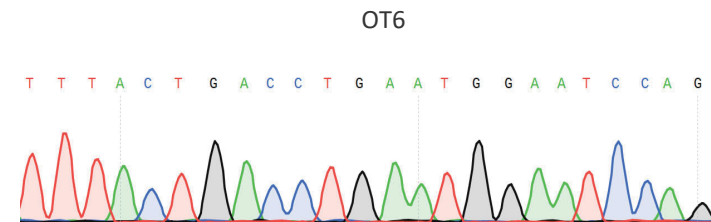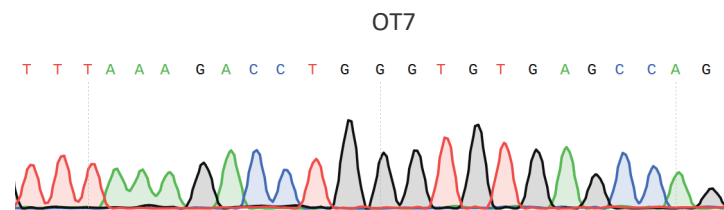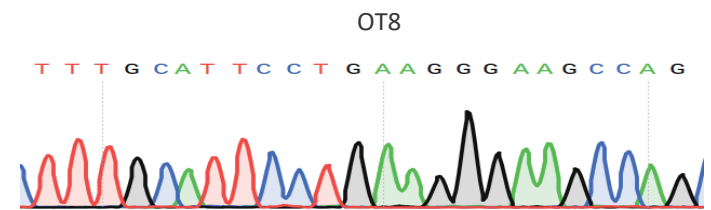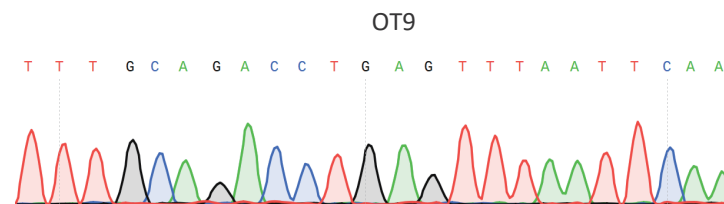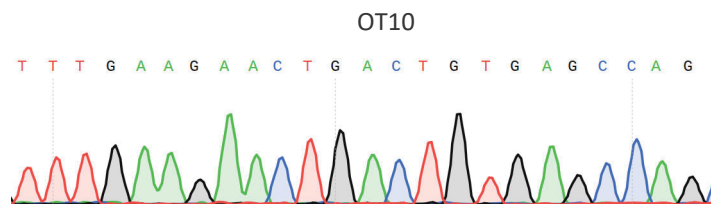

**Fig. S9 Off-target analysis of predicted off-target loci after Klkb1 editing by Un1Cas12f1.** Sanger sequencing results were shown for top 10 off-target loci (OT1 to OT10) predicted by OFFinder. OT: off-target.

Figure S10

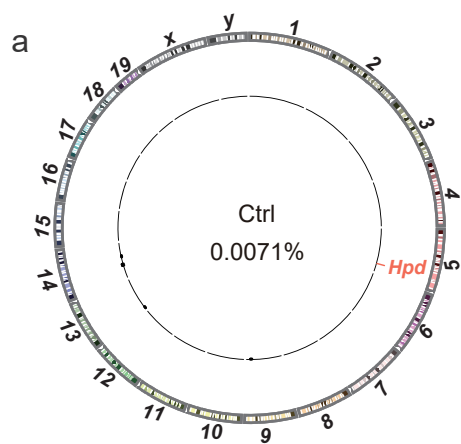

**b**

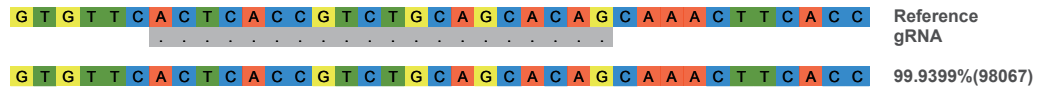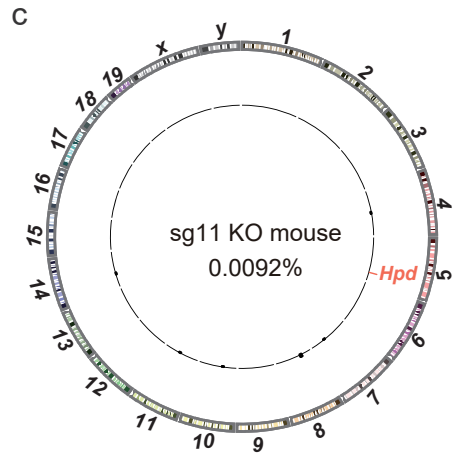

**d**

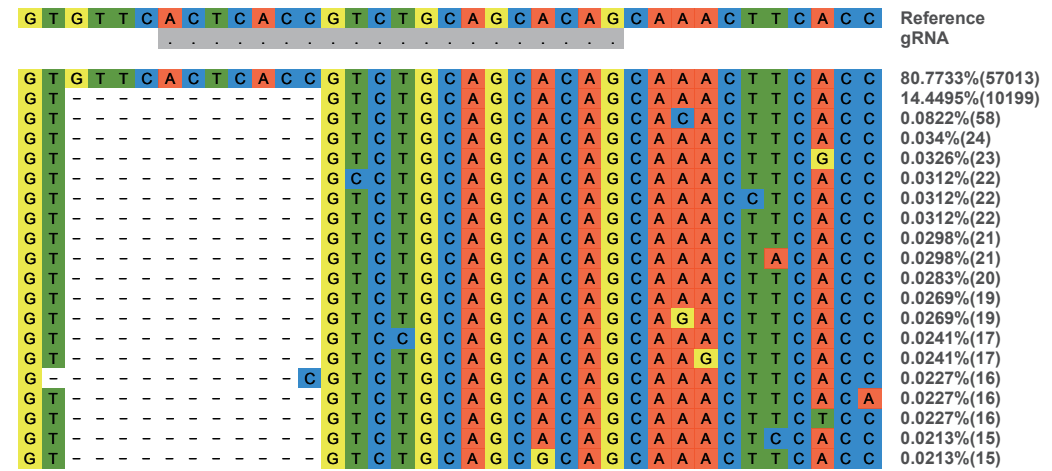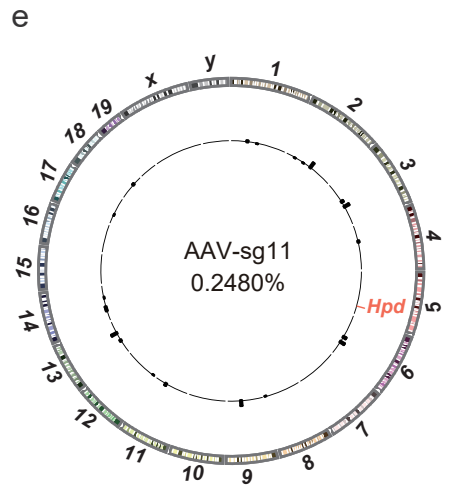

**f**

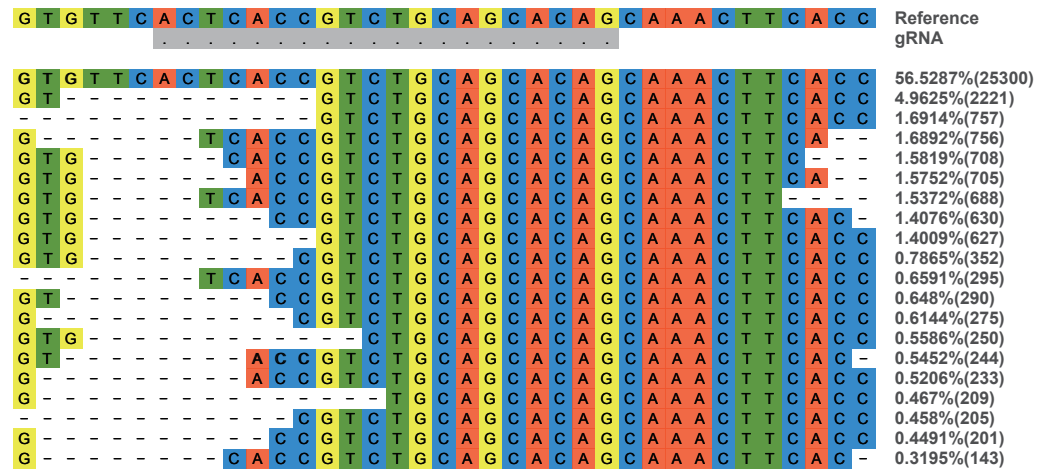



**Fig. S10 Genome-wide off-target analysis for Un1Cas12f1 with PEM-seq.**

**a,c,e** No genome-wide translocation events detected by PEM-seq for unedited (a) versus edited mouse tissue via embryonic injection (c) or AAV transduction (e) of Un1Cas12f1 targeting Hpd. **b,d,f** Indel mutations detected in unedited (b) versus edited mouse tissue (d,f) by PEM-seq.

## Supplementary Tables

**Table S1. Summary table of gRNA tested with or without editing activity for three different Cas12f1 orthologs**

| Gene editing tool | Number of tested site | Number of effective editing site |
|-------------------|-----------------------|----------------------------------|
| AsCas12f1         | 30                    | 0                                |
| SpCas12f1         | 29                    | 0                                |
| Un1Cas12f1        | 32                    | 5                                |

**Table S2. AsCas12f1 target site sequences in this study.**

| sgRNA              | Target site sequences (5'-3') | oligos                       |
|--------------------|-------------------------------|------------------------------|
| <i>Trp53-site1</i> | CTGCCCCAGGATGTTGAGGA          | GAAC<br>CTGCCCCAGGATGTTGAGGA |
|                    |                               | AAAA<br>TCCTCAACATCCTGGGGCAG |
| <i>Trp53-site2</i> | AGGAGTTTTTTGAAGGCCCA          | GAAC<br>AGGAGTTTTTTGAAGGCCCA |
|                    |                               | AAAA<br>TGGGCCTTCAAAAACTCCT  |
| <i>Trp53-site3</i> | AAGGCCCAAGTGAAGCCCTC          | GAAC<br>AAGGCCCAAGTGAAGCCCTC |
|                    |                               | AAAA<br>GAGGGCTTCACTTGGGCCTT |
| <i>Trp53-site4</i> | GGCCTTCAAAAACTCCTCA           | GAAC<br>GGCCTTCAAAAACTCCTCA  |
|                    |                               | AAAA<br>TGAGGAGTTTTTTGAAGGCC |
| <i>Trp53-site5</i> | TCCCTTCTCAAAAACTTAC           | GAAC TCCCTTCTCAAAAACTTAC     |
|                    |                               | AAAA GTAAGTTTTTTGAGAAGGGA    |
| <i>Trp53-site6</i> | AGAAGGGACAAAAGATGACA          | GAAC<br>AGAAGGGACAAAAGATGACA |
|                    |                               | AAAA TGTCATCTTTTGTCCCTTCT    |
| <i>Trp53-site7</i> | GCTGTCCCAGACTGCAGGAA          | GAAC<br>GCTGTCCCAGACTGCAGGAA |
|                    |                               | AAAA<br>TTCCTGCAGTCTGGGACAGC |
| <i>Trp53-site8</i> | TGTGCACGGTGAAGTGGGCC          | GAAC<br>TGTGCACGGTGAAGTGGGCC |
|                    |                               | AAAA<br>GGGCCCACTCACCGTGCACA |
| <i>Trp53-site9</i> | AGGGGAGGAGAGTACTGGAA          | GAAC<br>AGGGGAGGAGAGTACTGGAA |
|                    |                               | AAAA TTCCAGTACTCTCCTCCCCT    |

|                      |                       |                               |
|----------------------|-----------------------|-------------------------------|
| <i>Trp53</i> -site10 | TGGGTCAGCGCCACACCTCC  | GAAC<br>TGGGTCAGCGCCACACCTCC  |
|                      |                       | AAAA<br>GGAGGTGTGGCGCTGACCCA  |
| <i>Trp53</i> -site11 | TAGATGGCCATGGCGCGGAC  | GAAC<br>TAGATGGCCATGGCGCGGAC  |
|                      |                       | AAAA<br>GTCCGCGCCATGGCCATCTA  |
| <i>Trp53</i> -site12 | TCCGGGTGGAAGGAAATTTG  | GAAC<br>TCCGGGTGGAAGGAAATTTG  |
|                      |                       | AAAA CAAATTTCTTCCACCCGGA      |
| <i>Trp53</i> -site13 | TATCCCGAGTATCTGGAAGA  | GAAC<br>TATCCCGAGTATCTGGAAGA  |
|                      |                       | AAAA TCTTCCAGATACTCGGGATA     |
| <i>Trp53</i> -site14 | TGAGCCACCCGAGGTCTGTA  | GAAC<br>TGAGCCACCCGAGGTCTGTA  |
|                      |                       | AAAA<br>TACAGACCTCGGGTGGCTCA  |
| <i>Trp53</i> -site15 | TAGTGGATGGTGGTATACTC  | GAAC TAGTGGATGGTGGTATACTC     |
|                      |                       | AAAA GAGTATACCACCATCCACTA     |
| <i>Trp53</i> -site16 | CACATGTACTTGTAGTGGAT  | GAAC CACATGTACTTGTAGTGGAT     |
|                      |                       | AAAA ATCCACTACAAGTACATGTG     |
| <i>Trp53</i> -site17 | CCATCATCACACTGGAAGAC  | GAAC<br>CCATCATCACACTGGAAGAC  |
|                      |                       | AAAA<br>GTCTTCCAGTGTGATGATGG  |
| <i>Trp53</i> -site18 | AGGTTTCGTGTTTGTGCCTGC | GAAC<br>AGGTTTCGTGTTTGTGCCTGC |
|                      |                       | AAAA<br>GCAGGCACAAACACGAACCT  |
| <i>Trp53</i> -site19 | TGCCTGCCCTGGGAGAGACC  | GAAC<br>TGCCTGCCCTGGGAGAGACC  |
|                      |                       | AAAA<br>GGTCTCTCCAGGGCAGGCA   |
| <i>Trp53</i> -site20 | CGGAAATTTTCTTCTTCTGT  | GAAC CGGAAATTTTCTTCTTCTGT     |
|                      |                       | AAAA<br>ACAGAAGAAGAAAATTTCCG  |
| <i>Trp53</i> -site21 | CCCTGAACTGCCCCAGGGA   | GAAC<br>CCCTGAACTGCCCCAGGGA   |
|                      |                       | AAAA<br>TCCCTGGGGGCAGTTCAGGG  |
| <i>Trp53</i> -site22 | TGCAGGTGGGCAGCGCTGTG  | GAAC<br>TGCAGGTGGGCAGCGCTGTG  |

|                      |                      |                                                              |
|----------------------|----------------------|--------------------------------------------------------------|
|                      |                      | AAAA<br>CACAGCGCTGCCACCTGCA                                  |
| <i>Trp53</i> -site23 | CGGGGGAGAGGCGCTTGTGC | GAAC<br>CGGGGGAGAGGCGCTTGTGC<br>AAAA<br>GCACAAGCGCCTCTCCCCCG |
| <i>Trp53</i> -site24 | ATGGAGAGTATTTACCCTC  | GAAC<br>ATGGAGAGTATTTACCCTC<br>AAAA GAGGGTGAAATACTCTCCAT     |
| <i>Trp53</i> -site25 | AGGGTGAAATACTCTCCATC | GAAC<br>AGGGTGAAATACTCTCCATC<br>AAAA GATGGAGAGTATTTACCCT     |
| <i>Trp53</i> -site26 | GTACCTTGAGGGTGAAATAC | GAAC<br>GTACCTTGAGGGTGAAATAC<br>AAAA GTATTTACCCTCAAGGTAC     |
| <i>Trp53</i> -site27 | CGCCCGCGGATCTGCAGCAG | GAAC<br>CGCCCGCGGATCTGCAGCAG<br>AAAA<br>CTGCTGCAGATCCGCGGGCG |
| <i>Trp53</i> -site28 | GAGTTAAAGGATGCCCATGC | GAAC<br>GAGTTAAAGGATGCCCATGC<br>AAAA GCATGGGCATCCTTTAACTC    |
| <i>Trp53</i> -site29 | AAGGATGCCCATGCTACAGA | GAAC<br>AAGGATGCCCATGCTACAGA<br>AAAA TCTGTAGCATGGGCATCCTT    |
| <i>Trp53</i> -site30 | CCTGGAGTGAGCCCTGCTGT | GAAC<br>CCTGGAGTGAGCCCTGCTGT<br>AAAA<br>ACAGCAGGGCTCACTCCAGG |

**Table S3. SpCas12f1 target site sequences in this study.**

| sgRNA               | Target site sequences (5'-3') | oligos                                                       |
|---------------------|-------------------------------|--------------------------------------------------------------|
| <i>Trp53</i> -site1 | CAGGCTTATGGAAACTGTGA          | AAAC<br>CAGGCTTATGGAAACTGTGA<br>AAAA TCACAGTTTCCATAAGCCTG    |
| <i>Trp53</i> -site2 | CATAAGCCTGAAAATGTCTC          | AAAC CATAAGCCTGAAAATGTCTC<br>AAAA GAGACATTTTCAGGCTTATG       |
| <i>Trp53</i> -site3 | TTGAAGGCCCAAGTGAAGCC          | AAAC<br>TTGAAGGCCCAAGTGAAGCC<br>AAAA<br>GGCTTCACTTGGGCCTTCAA |
| <i>Trp53</i> -site4 | TGAAGGCCCAAGTGAAGCCC          | AAAC<br>TGAAGGCCCAAGTGAAGCCC                                 |

|                     |                      |                                                              |
|---------------------|----------------------|--------------------------------------------------------------|
|                     |                      | AAAA<br>GGGCTTCACTTGGGCCTTCA                                 |
| <i>Trp53-site5</i>  | GAAGGCCCAAGTGAAGCCCT | AAAC<br>GAAGGCCCAAGTGAAGCCCT<br>AAAA<br>AGGGCTTCACTTGGGCCTTC |
| <i>Trp53-site6</i>  | AAGGCCCAAGTGAAGCCCTC | AAAC<br>AAGGCCCAAGTGAAGCCCTC<br>AAAA<br>GAGGGCTTCACTTGGGCCTT |
| <i>Trp53-site7</i>  | GTCCCTTCTCAAAAACTTA  | AAAC GTCCCTTCTCAAAAACTTA<br>AAAA TAAGTTTTTTGAGAAGGGAC        |
| <i>Trp53-site8</i>  | TCCCTTCTCAAAAACTTAC  | AAAC TCCCTTCTCAAAAACTTAC<br>AAAA GTAAGTTTTTTGAGAAGGGA        |
| <i>Trp53-site9</i>  | TCATCTTTTGTCCCTTCTCA | AAAC<br>TGAGAAGGGACAAAAGATGA<br>AAAA TCATCTTTTGTCCCTTCTCA    |
| <i>Trp53-site10</i> | GTCATCTTTTGTCCCTTCTC | AAAC<br>GAGAAGGGACAAAAGATGAC<br>AAAA GTCATCTTTTGTCCCTTCTC    |
| <i>Trp53-site11</i> | AGAAGGGACAAAAGATGACA | AAAC<br>AGAAGGGACAAAAGATGACA<br>AAAA TGTCATCTTTTGTCCCTTCT    |
| <i>Trp53-site12</i> | CTTCCACCCGGATAAGATGC | AAAC<br>CTTCCACCCGGATAAGATGC<br>AAAA<br>GCATCTTATCCGGGTGGAAG |
| <i>Trp53-site13</i> | TATCCCGAGTATCTGGAAGA | AAAC TATCCCGAGTATCTGGAAGA<br>AAAA TCTTCCAGATACTCGGGATA       |
| <i>Trp53-site14</i> | CGCCACAGCGTGGTGGTACC | AAAC<br>CGCCACAGCGTGGTGGTACC<br>AAAA<br>GGTACCACCACGCTGTGGCG |
| <i>Trp53-site15</i> | TTCTTCTGTACGGCGGTCTC | AAAC<br>TTCTTCTGTACGGCGGTCTC<br>AAAA<br>GAGACCGCCGTACAGAAGAA |
| <i>Trp53-site16</i> | CTTCTTCTGTACGGCGGTCT | AAAC<br>CTTCTTCTGTACGGCGGTCT<br>AAAA<br>AGACCGCCGTACAGAAGAAG |
| <i>Trp53-site17</i> | CGGAAATTTTCTTCTTCTGT | AAAC CGGAAATTTTCTTCTTCTGT<br>AAAA                            |

|                      |                       |                               |
|----------------------|-----------------------|-------------------------------|
|                      |                       | ACAGAAGAAGAAAATTTCCG          |
| <i>Trp53</i> -site18 | CGCAAAAAGGAAGTCCTTTG  | AAAC<br>CGCAAAAAGGAAGTCCTTTG  |
|                      |                       | AAAA CAAAGGACTTCCTTTTTGCG     |
| <i>Trp53</i> -site19 | TGCGGAAATTTCTTCTTCT   | AAAC TGCGGAAATTTCTTCTTCT      |
|                      |                       | AAAA<br>AGAAGAAGAAAATTTCCGCA  |
| <i>Trp53</i> -site20 | GCGGAAATTTCTTCTTCTG   | AAAC GCGGAAATTTCTTCTTCTG      |
|                      |                       | AAAA<br>CAGAAGAAGAAAATTTCCGC  |
| <i>Trp53</i> -site21 | CGCTCCCTGGGGGCAGTTCA  | AAAC<br>CGCTCCCTGGGGGCAGTTCA  |
|                      |                       | AAAA<br>TGAAGTCCCCCAGGGAGCG   |
| <i>Trp53</i> -site22 | CGGGGGAGAGGCGCTTGTGC  | AAAC<br>CGGGGGAGAGGCGCTTGTGC  |
|                      |                       | AAAA<br>GCACAAGCGCCTCTCCCCCG  |
| <i>Trp53</i> -site23 | GCGGGGGAGAGGCGCTTGTG  | AAAC<br>GCGGGGGAGAGGCGCTTGTG  |
|                      |                       | AAAA<br>CACAAGCGCCTCTCCCCCGC  |
| <i>Trp53</i> -site24 | TTTTGCGGGGGAGAGGCGCT  | AAAC<br>TTTTGCGGGGGAGAGGCGCT  |
|                      |                       | AAAA<br>AGCGCCTCTCCCCGCAAAA   |
| <i>Trp53</i> -site25 | CTTTTGCAGGGGGAGAGGCGC | AAAC<br>CTTTTGCAGGGGGAGAGGCGC |
|                      |                       | AAAA<br>GCGCCTCTCCCCGCAAAAG   |
| <i>Trp53</i> -site26 | TTCTTTTGCAGGGGGAGAGGC | AAAC<br>TTCTTTTGCAGGGGGAGAGGC |
|                      |                       | AAAA<br>GCCTCTCCCCGCAAAAGAA   |
| <i>Trp53</i> -site27 | ACCCTCAAGGTACCAAGGCT  | AAAC<br>ACCCTCAAGGTACCAAGGCT  |
|                      |                       | AAAA<br>AGCCTTGGTACCTTGAGGGT  |
| <i>Trp53</i> -site28 | CGCCCGCGGATCTGCAGCAG  | AAAC<br>CGCCCGCGGATCTGCAGCAG  |
|                      |                       | AAAA<br>CTGCTGCAGATCCGCGGGCG  |
| <i>Trp53</i> -       | ACTCTAAGGCCTCATTGAGC  | AAAC                          |

|        |  |                       |
|--------|--|-----------------------|
| site29 |  | ACTCTAAGGCCTCATTTCAGC |
|        |  | AAAA                  |
|        |  | GCTGAATGAGGCCTTAGAGT  |

**Table S4. Un1Cas12f1 target site sequences in this study.**

| sgRNA                | Target site sequences (5'-3') | oligos                       |
|----------------------|-------------------------------|------------------------------|
| <i>Trp53</i> -site1  | CAGGCTTATGGAACTGTGA           | CAAC                         |
|                      |                               | CAGGCTTATGGAACTGTGA          |
|                      |                               | AAAA TCACAGTTTCCATAAGCCTG    |
| <i>Trp53</i> -site2  | CATAAGCCTGAAAATGTCTC          | CAAC CATAAGCCTGAAAATGTCTC    |
|                      |                               | AAAA GAGACATTTTCAGGCTTATG    |
|                      |                               |                              |
| <i>Trp53</i> -site3  | TTGAAGGCCCAAGTGAAGCC          | CAAC                         |
|                      |                               | TTGAAGGCCCAAGTGAAGCC         |
|                      |                               | AAAA<br>GGCTTCACTTGGGCCTTCAA |
| <i>Trp53</i> -site4  | TGAAGGCCCAAGTGAAGCCC          | CAAC                         |
|                      |                               | TGAAGGCCCAAGTGAAGCCC         |
|                      |                               | AAAA<br>GGGCTTCACTTGGGCCTTCA |
| <i>Trp53</i> -site5  | GAAGGCCCAAGTGAAGCCCT          | CAAC                         |
|                      |                               | GAAGGCCCAAGTGAAGCCCT         |
|                      |                               | AAAA<br>AGGGCTTCACTTGGGCCTTC |
| <i>Trp53</i> -site6  | AAGGCCCAAGTGAAGCCCTC          | CAAC                         |
|                      |                               | AAGGCCCAAGTGAAGCCCTC         |
|                      |                               | AAAA<br>GAGGGCTTCACTTGGGCCTT |
| <i>Trp53</i> -site7  | GTCCCTTCTCAAAAACTTA           | CAAC GTCCCTTCTCAAAAACTTA     |
|                      |                               | AAAA TAAGTTTTTTGAGAAGGGAC    |
|                      |                               |                              |
| <i>Trp53</i> -site8  | TCCCTTCTCAAAAACTTAC           | CAAC TCCCTTCTCAAAAACTTAC     |
|                      |                               | AAAA GTAAGTTTTTTGAGAAGGGA    |
|                      |                               |                              |
| <i>Trp53</i> -site9  | TTGAGAAGGGACAAAAGATG          | CAAC                         |
|                      |                               | TTGAGAAGGGACAAAAGATG         |
|                      |                               | AAAA CATCTTTTGTCCCTTCTCAA    |
| <i>Trp53</i> -site10 | TGAGAAGGGACAAAAGATGA          | CAAC                         |
|                      |                               | TGAGAAGGGACAAAAGATGA         |
|                      |                               | AAAA TCATCTTTTGTCCCTTCTCA    |
| <i>Trp53</i> -site11 | GAGAAGGGACAAAAGATGAC          | CAAC                         |
|                      |                               | GAGAAGGGACAAAAGATGAC         |
|                      |                               | AAAA GTCATCTTTTGTCCCTTCTC    |
| <i>Trp53</i> -site12 | AGAAGGGACAAAAGATGACA          | CAAC                         |
|                      |                               | AGAAGGGACAAAAGATGACA         |
|                      |                               | AAAA TGTCATCTTTTGTCCCTTCT    |

|                      |                       |                               |
|----------------------|-----------------------|-------------------------------|
| <i>Trp53</i> -site13 | CTTCCACCCGGATAAGATGC  | CAAC<br>CTTCCACCCGGATAAGATGC  |
|                      |                       | AAAA<br>GCATCTTATCCGGGTGGAAG  |
| <i>Trp53</i> -site14 | TATCCCGAGTATCTGGAAGA  | CAAC<br>TATCCCGAGTATCTGGAAGA  |
|                      |                       | AAAA TCTTCCAGATACTCGGGATA     |
| <i>Trp53</i> -site15 | CGCCACAGCGTGGTGGTACC  | CAAC<br>CGCCACAGCGTGGTGGTACC  |
|                      |                       | AAAA<br>GGTACCACCACGCTGTGGCG  |
| <i>Trp53</i> -site16 | GCCACAGCGTGGTGGTACCT  | CAAC<br>GCCACAGCGTGGTGGTACCT  |
|                      |                       | AAAA<br>AGGTACCACCACGCTGTGGC  |
| <i>Trp53</i> -site17 | AGGTTTCGTGTTTGTGCCTGC | CAAC<br>AGGTTTCGTGTTTGTGCCTGC |
|                      |                       | AAAA<br>GCAGGCACAAACACGAACCT  |
| <i>Trp53</i> -site18 | TTCTTCTGTACGGCGGTCTC  | CAAC<br>TTCTTCTGTACGGCGGTCTC  |
|                      |                       | AAAA<br>GAGACCGCCGTACAGAAGAA  |
| <i>Trp53</i> -site19 | CTTCTTCTGTACGGCGGTCT  | CAAC<br>CTTCTTCTGTACGGCGGTCT  |
|                      |                       | AAAA<br>AGACCGCCGTACAGAAGAAG  |
| <i>Trp53</i> -site20 | CGGAAATTTTCTTCTTCTGT  | CAAC CGGAAATTTTCTTCTTCTGT     |
|                      |                       | AAAA<br>ACAGAAGAAGAAAATTTCCG  |
| <i>Trp53</i> -site21 | CGCAAAAAGGAAGTCCTTTG  | CAAC<br>CGCAAAAAGGAAGTCCTTTG  |
|                      |                       | AAAA CAAAGGACTTCCTTTTTGCG     |
| <i>Trp53</i> -site22 | TGCGGAAATTTTCTTCTTCT  | CAAC TGCGGAAATTTTCTTCTTCT     |
|                      |                       | AAAA<br>AGAAGAAGAAAATTTCCGCA  |
| <i>Trp53</i> -site23 | GCGGAAATTTTCTTCTTCTG  | CAAC GCGGAAATTTTCTTCTTCTG     |
|                      |                       | AAAA<br>CAGAAGAAGAAAATTTCCGC  |
| <i>Trp53</i> -site24 | CCCTGAACTGCCCCAGGGA   | CAAC<br>CCCTGAACTGCCCCAGGGA   |
|                      |                       | AAAA<br>TCCCTGGGGGCAGTTCAGGG  |



|                      |                      |                              |
|----------------------|----------------------|------------------------------|
| <i>Trp53</i> -site25 | CGCTCCCTGGGGGCAGTTCA | CAAC<br>CGCTCCCTGGGGGCAGTTCA |
|                      |                      | AAAA<br>TGAAGTCCCCCAGGGAGCG  |
| <i>Trp53</i> -site26 | CGGGGGAGAGGCGCTTGTGC | CAAC<br>CGGGGGAGAGGCGCTTGTGC |
|                      |                      | AAAA<br>GCACAAGCGCCTCTCCCCCG |
| <i>Trp53</i> -site27 | GCGGGGGAGAGGCGCTTGTG | CAAC<br>GCGGGGGAGAGGCGCTTGTG |
|                      |                      | AAAA<br>CACAAGCGCCTCTCCCCCGC |
| <i>Trp53</i> -site28 | TTTTGCGGGGGAGAGGCGCT | CAAC<br>TTTTGCGGGGGAGAGGCGCT |
|                      |                      | AAAA<br>AGCGCCTCTCCCCCGCAAAA |
| <i>Trp53</i> -site29 | CTTTTGCGGGGGAGAGGCGC | CAAC<br>CTTTTGCGGGGGAGAGGCGC |
|                      |                      | AAAA<br>GCGCCTCTCCCCCGCAAAG  |
| <i>Trp53</i> -site30 | TCTTTTGCGGGGGAGAGGCG | CAAC<br>TCTTTTGCGGGGGAGAGGCG |
|                      |                      | AAAA<br>CGCCTCTCCCCCGCAAAGA  |
| <i>Trp53</i> -site31 | TTCTTTTGCGGGGGAGAGGC | CAAC<br>TTCTTTTGCGGGGGAGAGGC |
|                      |                      | AAAA<br>GCCTCTCCCCCGCAAAGAA  |
| <i>Trp53</i> -site32 | ACCCTCAAGGTACCAAGGCT | CAAC<br>ACCCTCAAGGTACCAAGGCT |
|                      |                      | AAAA<br>AGCCTTGGTACCTTGAGGGT |
| <i>Tyr</i> -site1    | GTATTGCCTTCTGTGGAGTT | CAAC<br>GTATTGCCTTCTGTGGAGTT |
|                      |                      | AAAA<br>AACTCCACAGAAGGCAATAC |
| <i>Tyr</i> -site2    | TATTGCCTTCTGTGGAGTTT | CAAC TATTGCCTTCTGTGGAGTTT    |
|                      |                      | AAAA<br>AAACTCCACAGAAGGCAATA |
| <i>Tyr</i> -site3    | CAGATCTCTGATGGCCATTT | CAAC CAGATCTCTGATGGCCATTT    |
|                      |                      | AAAA AAATGGCCATCAGAGATCTG    |
| <i>Tyr</i> -site4    | CCTCGAGCCTGTGCCTCCTC | CAAC<br>CCTCGAGCCTGTGCCTCCTC |

|                   |                      |                              |
|-------------------|----------------------|------------------------------|
|                   |                      | AAAA<br>GAGGAGGCACAGGCTCGAGG |
| <i>Tyr-site5</i>  | CTCGAGCCTGTGCCTCCTCT | CAAC<br>CTCGAGCCTGTGCCTCCTCT |
|                   |                      | AAAA<br>AGAGGAGGCACAGGCTCGAG |
| <i>Tyr-site6</i>  | GCCAACAAGTTCTTAGAGGA | CAAC<br>GCCAACAAGTTCTTAGAGGA |
|                   |                      | AAAA TCCTCTAAGAACTTGTTGGC    |
| <i>Tyr-site7</i>  | AGGCAGAGGTTCTGCCAGG  | CAAC<br>AGGCAGAGGTTCTGCCAGG  |
|                   |                      | AAAA<br>CCTGGCAGGAACCTCTGCCT |
| <i>Tyr-site8</i>  | AAGGGGAACTGAGGTCCAGA | CAAC<br>AAGGGGAACTGAGGTCCAGA |
|                   |                      | AAAA<br>TCTGGACCTCAGTTCCCCTT |
| <i>Tyr-site9</i>  | ATAATAGGACCTGCCAGTGC | CAAC<br>ATAATAGGACCTGCCAGTGC |
|                   |                      | AAAA GCACTGGCAGGTCCTATTAT    |
| <i>Tyr-site10</i> | TAATAGGACCTGCCAGTGCT | CAAC<br>TAATAGGACCTGCCAGTGCT |
|                   |                      | AAAA AGCACTGGCAGGTCCTATTA    |
| <i>Tyr-site11</i> | AACTGCGGAAACTGTAAGTT | CAAC<br>AACTGCGGAAACTGTAAGTT |
|                   |                      | AAAA AACTTACAGTTTCCGCAGTT    |
| <i>Tyr-site12</i> | CGCAGTTGAAACCCATGAAG | CAAC<br>CGCAGTTGAAACCCATGAAG |
|                   |                      | AAAA<br>CTTCATGGGTTTCAACTGCG |
| <i>Tyr-site13</i> | GATTTGGGGGCCCAAATTGT | CAAC<br>GATTTGGGGGCCCAAATTGT |
|                   |                      | AAAA<br>ACAATTTGGGCCCCCAAATC |
| <i>Tyr-site14</i> | GGGGCCCAAATTGTACAGAG | CAAC<br>GGGGCCCAAATTGTACAGAG |
|                   |                      | AAAA<br>CTCTGTACAATTTGGGCCCC |
| <i>Tyr-site15</i> | GGCCCCCAAATCCAACTTA  | CAAC<br>GGCCCCCAAATCCAACTTA  |
|                   |                      | AAAA<br>TAAGTTTGGATTTGGGGGCC |
| <i>Tyr-site16</i> | TTCTAATCAAGACTCGCTTC | CAAC TTCTAATCAAGACTCGCTTC    |

|                   |                      |                                                              |
|-------------------|----------------------|--------------------------------------------------------------|
|                   |                      | AAAA<br>GAAGCGAGTCTTGATTAGAA                                 |
| <i>Tyr-site17</i> | GATTTGAGTGTCTCCGAAAA | CAAC<br>GATTTGAGTGTCTCCGAAAA<br>AAAA TTTTCGGAGACACTCAAATC    |
| <i>Tyr-site18</i> | ATTTGAGTGTCTCCGAAAAG | CAAC<br>ATTTGAGTGTCTCCGAAAAG<br>AAAA CTTTTCGGAGACACTCAAAT    |
| <i>Tyr-site19</i> | GGAGACACTCAAATCAAAAA | CAAC<br>GGAGACACTCAAATCAAAAA<br>AAAA TTTTTGATTTGAGTGTCTCC    |
| <i>Tyr-site20</i> | CGGAGACACTCAAATCAAAA | CAAC<br>CGGAGACACTCAAATCAAAA<br>AAAA TTTTGCTAAAGTGAGGTAAG    |
| <i>Tyr-site21</i> | TTACCTCACTTTAGCAAAC  | CAAC TTACCTCACTTTAGCAAAC<br>AAAA GTTTTGCTAAAGTGAGGTAA        |
| <i>Tyr-site22</i> | GCAAAACATACTATCAGCTC | CAAC GCAAAACATACTATCAGCTC<br>AAAA GAGCTGATAGTATGTTTTGC       |
| <i>Tyr-site23</i> | CTAAAGTGAGGTAAGAAAAG | CAAC<br>CTAAAGTGAGGTAAGAAAAG<br>AAAA CTTTTCTTACCTCACTTTAG    |
| <i>Tyr-site24</i> | GCTAAAGTGAGGTAAGAAAA | CAAC<br>GCTAAAGTGAGGTAAGAAAA<br>AAAA TTTTCTTACCTCACTTTAGC    |
| <i>Tyr-site25</i> | GCCATAGGTGCCTGTGGGGA | CAAC<br>GCCATAGGTGCCTGTGGGGA<br>AAAA<br>TCCCCACAGGCACCTATGGC |
| <i>Tyr-site26</i> | ATGATATCAACATCTACGAC | CAAC ATGATATCAACATCTACGAC<br>AAAA GTCGTAGATGTTGATATCAT       |
| <i>Tyr-site27</i> | TATGGATGCATTACTATGTG | CAAC TATGGATGCATTACTATGTG<br>AAAA CACATAGTAATGCATCCATA       |
| <i>Tyr-site28</i> | AGAGCCCCCAAGCAGTGTGT | CAAC<br>AGAGCCCCCAAGCAGTGTGT<br>AAAA<br>ACACACTGCTTGGGGGCTCT |
| <i>Tyr-site29</i> | GCCCATGAAGCACCAGGGTT | CAAC<br>GCCCATGAAGCACCAGGGTT<br>AAAA<br>AACCTGGTGCTTCATGGGC  |
| <i>Tyr-site30</i> | CCCATGAAGCACCAGGGTTT | CAAC<br>CCCATGAAGCACCAGGGTTT<br>AAAA                         |

|                   |                      |                              |
|-------------------|----------------------|------------------------------|
|                   |                      | AAACCCTGGTGCTTCATGGG         |
| <i>Tyr-site31</i> | TGCCTTGGCACAGACTTTTC | CAAC<br>TGCCTTGGCACAGACTTTTC |
|                   |                      | AAAA<br>GAAAAGTCTGTGCCAAGGCA |
| <i>Tyr-site32</i> | CTTGTTATTGTGGGAACAAG | CAAC<br>CTTGTTATTGTGGGAACAAG |
|                   |                      | AAAA CTTGTTCCCACAATAACAAG    |
| <i>Tyr-site33</i> | TTGTTATTGTGGGAACAAGA | CAAC<br>TTGTTATTGTGGGAACAAGA |
|                   |                      | AAAA TCTTGTTCCCACAATAACAA    |
| <i>Tyr-site34</i> | TTGTTCCCACAATAACAAGA | CAAC TTGTTCCCACAATAACAAGA    |
|                   |                      | AAAA TCTTGTTATTGTGGGAACAA    |
| <i>Tyr-site35</i> | TGCATCTCTCCAATCCCAGT | CAAC<br>TGCATCTCTCCAATCCCAGT |
|                   |                      | AAAA<br>ACTGGGATTGGAGAGATGCA |
| <i>Tyr-site36</i> | CTGCATCTCTCCAATCCCAG | CAAC<br>CTGCATCTCTCCAATCCCAG |
|                   |                      | AAAA<br>CTGGGATTGGAGAGATGCAG |
| <i>Tyr-site37</i> | CACAGATGAGTACTTGGGAG | CAAC<br>CACAGATGAGTACTTGGGAG |
|                   |                      | AAAA CTCCAAGTACTCATCTGTG     |
| <i>Tyr-site38</i> | AGGGTGACGACCTCCCAAGT | CAAC<br>AGGGTGACGACCTCCCAAGT |
|                   |                      | AAAA<br>ACTTGGGAGGTCGTCACCCT |
| <i>Tyr-site39</i> | CAGGGTGACGACCTCCCAAG | CAAC<br>CAGGGTGACGACCTCCCAAG |
|                   |                      | AAAA<br>CTTGGGAGGTCGTCACCCTG |
| <i>Hpd-site1</i>  | CACTCGGTGACCTTCTGGGT | CAAC<br>CACTCGGTGACCTTCTGGGT |
|                   |                      | AAAA<br>ACCCAGAAGGTCACCGAGTG |
| <i>Hpd-site2</i>  | CAGGCTGCTTCTTCTACTG  | CAAC<br>CAGGCTGCTTCTTCTACTG  |
|                   |                      | AAAA<br>CAGTAGAAGGAAGCAGCCTG |
| <i>Hpd-site3</i>  | AACCTCTGGCCTACAGGGGC | CAAC<br>AACCTCTGGCCTACAGGGGC |
|                   |                      | AAAA                         |

|                   |                      |                               |
|-------------------|----------------------|-------------------------------|
|                   |                      | GCCCCTGTAGGCCAGAGGTT          |
| <i>Hpd-site4</i>  | CCTTGCTTGATGACGTGGCT | CAAC<br>CCTTGCTTGATGACGTGGCT  |
|                   |                      | AAAA<br>AGCCACGTCATCAAGCAAGG  |
| <i>Hpd-site5</i>  | GATTGTGTTTGTCTCTGCT  | CAAC GATTGTGTTTGTCTCTGCT      |
|                   |                      | AAAA<br>AGCAGAGAACAAACACAATC  |
| <i>Hpd-site6</i>  | TTCTCTGCTCTGCTCTCAAT | CAAC TTCTCTGCTCTGCTCTCAAT     |
|                   |                      | AAAA<br>ATTGAGAGCAGAGCAGAGAA  |
| <i>Hpd-site7</i>  | TTCCAGGGATTGAGAGCAGA | CAAC<br>TTCCAGGGATTGAGAGCAGA  |
|                   |                      | AAAA TCTGCTCTCAATCCCTGGAA     |
| <i>Hpd-site8</i>  | ACCCCGTCGCCATGCTTCAC | CAAC<br>ACCCCGTCGCCATGCTTCAC  |
|                   |                      | AAAA<br>GTGAAGCATGGCGACGGGGT  |
| <i>Hpd-site9</i>  | GCGCCCCGTTCTCGAGCTTT | CAAC<br>GCGCCCCGTTCTCGAGCTTT  |
|                   |                      | AAAA<br>AAAGCTCGAGAACGGGGCGC  |
| <i>Hpd-site10</i> | TCTTGCTCCACCCATGGCTC | CAAC<br>TCTTGCTCCACCCATGGCTC  |
|                   |                      | AAAA<br>GAGCCATGGGTGGAGCAAGA  |
| <i>Hpd-site11</i> | GGAAGGTGAAGTTTGCTGTG | CAAC<br>GGAAGGTGAAGTTTGCTGTG  |
|                   |                      | AAAA<br>CACAGCAAAC TTCACCTTCC |
| <i>Hpd-site12</i> | CTGTGCTGCAGACGGTGAGT | CAAC<br>CTGTGCTGCAGACGGTGAGT  |
|                   |                      | AAAA<br>ACTCACCGTCTGCAGCACAG  |
| <i>Hpd-site13</i> | TTACCTGGATTCGAGGCCCC | CAAC<br>TTACCTGGATTCGAGGCCCC  |
|                   |                      | AAAA<br>GGGGCCTCGAATCCAGGTAA  |
| <i>Hpd-site14</i> | GAAGCAGGGTATCCTTGAT  | CAAC<br>GAAGCAGGGTATCCTTGAT   |
|                   |                      | AAAA ATACAAGGATACCCTGCTTC     |
| <i>Hpd-site15</i> | TTGGTCGGGTTGGTTGCCTA | CAAC<br>TTGGTCGGGTTGGTTGCCTA  |

|                    |                      |                                                              |
|--------------------|----------------------|--------------------------------------------------------------|
|                    |                      | AAAA<br>TAGGCAACCAACCCGACCAA                                 |
| <i>Hpd</i> -site16 | AGGTACCTGCAGAGTGGCCA | CAAC<br>AGGTACCTGCAGAGTGGCCA<br>AAAA<br>TGGCCACTCTGCAGGTACCT |
| <i>Hpd</i> -site17 | ATGGATTCCTCGTAGTTGGT | CAAC ATGGATTCCTCGTAGTTGGT<br>AAAA ACCAACTACGAGGAATCCAT       |
| <i>Hpd</i> -site18 | GATGGATTCCTCGTAGTTGG | CAAC<br>GATGGATTCCTCGTAGTTGG<br>AAAA CCAACTACGAGGAATCCATC    |
| <i>Hpd</i> -site19 | TAGTAAGAAGATGGGGCGGC | CAAC<br>TAGTAAGAAGATGGGGCGGC<br>AAAA GCCGCCCATCTTCTTACTA     |
| <i>Hpd</i> -site20 | TCGTCATAGTCGACTAGGAT | CAAC TCGTCATAGTCGACTAGGAT<br>AAAA ATCCTAGTCGACTATGACGA       |
| <i>Hpd</i> -site21 | GAGCGGGCAACTTCAACTCT | CAAC<br>GAGCGGGCAACTTCAACTCT<br>AAAA<br>AGAGTTGAAGTTGCCCGCTC |
| <i>Hpd</i> -site22 | AGATTGTGTTTGTCTCTGC  | CAAC AGATTGTGTTTGTCTCTGC<br>AAAA<br>GCAGAGAACAACACAATCT      |
| <i>Hpd</i> -site23 | TAGATTGTGTTTGTCTCTG  | CAAC TAGATTGTGTTTGTCTCTG<br>AAAA CAGAGAACAACACAATCTA         |
| <i>Hpd</i> -site24 | GGCGCCCCGTTCTCGAGCTT | CAAC<br>GGCGCCCCGTTCTCGAGCTT<br>AAAA<br>AAGCTCGAGAACGGGGCGCC |

**Table S5. CjCas9 target site sequences in this study.**

| sgRN<br>A         | Target site sequences (5'-3') | Primer sequences (5'-3')                                            |
|-------------------|-------------------------------|---------------------------------------------------------------------|
| <i>Hpd</i> -site1 | GGGATTGAGAGCAGAGCAGA<br>GA    | CACCGGGGATTGAGAGCAGAGCAGA<br>GA<br>AAAC TCTCTGCTCTGCTCTCAATCCC<br>C |
| <i>Hpd</i> -site2 | TTTGTCTTGCTCCACCCATGG<br>C    | CACC G<br>TTTGTCTTGCTCCACCCATGGC<br>AAACGCCATGGGTGGAGCAAGACAAA<br>C |
| <i>Hpd</i> -site3 | GCGTCAGTGTTCACTCACCGT<br>C    | CACC G<br>GCGTCAGTGTTCACTCACCGTC                                    |

|                        |                             |                                  |
|------------------------|-----------------------------|----------------------------------|
|                        |                             | AAACGACGGTGAGTGAACACTGACGC<br>C  |
| <i>Hpd</i> -<br>site4  | CTTCTCACCCCCAGTATGGAG<br>A  | CACC G<br>CTTCTCACCCCCAGTATGGAGA |
|                        |                             | AAAC TCTCCATACTGGGGGTGAGAAG<br>C |
| <i>Hpd</i> -<br>site5  | TCACCCCCAGTATGGAGATAC<br>C  | CACC G<br>TCACCCCCAGTATGGAGATACC |
|                        |                             | AAAC GGTATCTCCATACTGGGGGTGA<br>C |
| <i>Hpd</i> -<br>site6  | TCCACCAGGGTGTGTGTGGTA<br>T  | CACC G<br>TCCACCAGGGTGTGTGTGGTAT |
|                        |                             | AAAC ATACCACACACACCCTGGTGA<br>C  |
| <i>Hpd</i> -<br>site7  | ACACACCCTGGTGGAGAAGAT<br>C  | CACCG<br>ACACACCCTGGTGGAGAAGATC  |
|                        |                             | AAAC GATCTTCTCCACCAGGGTGTGT<br>C |
| <i>Hpd</i> -<br>site8  | TTCTTACCTGGATTTCGAGGCC<br>C | CACC G<br>TTCTTACCTGGATTTCGAGGCC |
|                        |                             | AAACGGGCCTCGAATCCAGGTAAGAA<br>C  |
| <i>Hpd</i> -<br>site9  | TGGATTTCGAGGCCCAACATA<br>C  | CACC G<br>TGGATTTCGAGGCCCAACATAC |
|                        |                             | AAAC GTATGTTGGGGCCTCGAATCCA<br>C |
| <i>Hpd</i> -<br>site10 | GTTCCACCGGTTCTGGTCCGT<br>G  | CACC G<br>GTTCCACCGGTTCTGGTCCGTG |
|                        |                             | AAACCACGGACCAGAACCGGTGGAA<br>CC  |
| <i>Hpd</i> -<br>site11 | TTCTGGTCCGTGGACGACACG<br>C  | CACC G<br>TTCTGGTCCGTGGACGACACGC |
|                        |                             | AAACGCGTGTCTCCACGGACCAGAA<br>C   |
| <i>Hpd</i> -<br>site12 | CTGGTCCGTGGACGACACGC<br>AG  | CACCG<br>CTGGTCCGTGGACGACACGCAG  |
|                        |                             | AAAC<br>CTGCGTGTCTCCACGGACCAG C  |
| <i>Hpd</i> -<br>site13 | GTGGACGACACGCAGGTGCA<br>CA  | CACCGGTGGACGACACGCAGGTGCA<br>CA  |
|                        |                             | AAAC TGTGCACCTGCGTGTCTCCAC<br>C  |
| <i>Hpd</i> -<br>site14 | GGAGCGCAGAGAGCTGTACTC<br>C  | CACCG<br>GGAGCGCAGAGAGCTGTACTCC  |

|                        |                            |                                  |
|------------------------|----------------------------|----------------------------------|
|                        |                            | AAAC GGAGTACAGCTCTCTGCGCTCC<br>C |
| <i>Hpa</i> -<br>site15 | GACTATAATGGGGGTGCTGGG<br>G | CACC G<br>GACTATAATGGGGGTGCTGGGG |
|                        |                            | AAAC CCCCAGCACCCCCATTATAGTC<br>C |
| <i>Hpa</i> -<br>site16 | TCTTGAGAGCGATGTGCTGGA<br>C | CACC G<br>TCTTGAGAGCGATGTGCTGGAC |
|                        |                            | AAAC GTCCAGCACATCGCTCTCAAGA<br>C |
| <i>Hpa</i> -<br>site17 | ACAGATCCGCCACTTGAGGGA<br>G | CACC G<br>ACAGATCCGCCACTTGAGGGAG |
|                        |                            | AAAC CTCCCTCAAGTGGCGGATCTGT<br>C |
| <i>Hpa</i> -<br>site18 | TCACCAAGCCCATGCAGGACC<br>G | CACC G<br>TCACCAAGCCCATGCAGGACCG |
|                        |                            | AAAC CGGTCCTGCATGGGCTTGGTGA<br>C |
| <i>Hpa</i> -<br>site19 | AAGTCATTCAACGTCACAACCA     | CACC G<br>AAGTCATTCAACGTCACAACCA |
|                        |                            | AAAC TGGTTGTGACGTTGAATGACTT<br>C |

**Table S6. PCR and IVT primers used in this study.**

| Primer          | Primer sequences (5'-3') |
|-----------------|--------------------------|
| mTrp53-exon1-1f | TATTCTACCCTTTCCTATAAGCC  |
| mTrp53-exon1-1r | AGGCTGGCCTCCAACCTTGCTATG |
| mTrp53-exon1-2f | CATACAGTACACAATCTCTT     |
| mTrp53-exon1-2r | GATTTACAGACACCCAACAC     |
| mTrp53-exon3-1f | CAGAAGATATCCTGGTAAGGCC   |
| mTrp53-exon3-1r | TGGAGAGATGCAGAGAATATGAG  |
| mTrp53-exon3-2f | CTTTGGTGTTGGGCTGGTAG     |
| mTrp53-exon3-2r | GGCAAACTAACTCTGAGG       |
| mTrp53-exon4-1f | AGGTCCCAGTCTCTCTTTGCTG   |
| mTrp53-exon4-1r | TTAAAGTAGACCCTGGGCTGGGC  |
| mTrp53-exon4-2f | ATGGTGCTTGGACAATGTGT     |
| mTrp53-exon4-2r | TAAGCCTAGCTAGCACTCAG     |
| mTrp53-exon6-1f | ATCCCTACTCTACAACAAAACCT  |
| mTrp53-exon6-1r | AAGGTCCAGTTACAGGAACCCCG  |
| mTrp53-exon6-2f | ATTAGAGGCTATAGCCAGCC     |
| mTrp53-exon6-2r | GACTTCATTTAGGTAGATAG     |
| mTrp53-exon7-1f | CCTTTGGCTGCAGATATGACAAG  |
| mTrp53-exon7-1r | GCACAGCCTCAGAGCATGAGCTC  |



|                 |                          |
|-----------------|--------------------------|
| mTrp53-exon7-2f | CTAGTTTACACACAGTCAGG     |
| mTrp53-exon7-2r | AGATAAAGCCACTGAAAAAG     |
| mTrp53-exon9-1f | TGGAGCCAGCTTAAGTTGGGAAC  |
| mTrp53-exon9-1r | TGCAGCCCTAAGCATCTAGCAGG  |
| mTrp53-exon9-2f | TAAAATCGTGAAAGTGGTTG     |
| mTrp53-exon9-2r | TACAAAGGCTGAGCTGGAGG     |
| mHpd-exon2-1f   | GAGCAGGGTGAGTCCCATTCTCG  |
| mHpd-exon2-1r   | CAAGGTTCCAAAGTGCCAGTCCT  |
| mHpd-exon2-2f   | CTGCTTCCTGGGACTCATCC     |
| mHpd-exon2-2r   | CACTAGCCAATCCCAGTTCC     |
| mHpd-exon3-1f   | CAATCAGGGTCCCCAAGGACCTT  |
| mHpd-exon3-1r   | GAGAAGTTTCAAACCAGGAAGAT  |
| mHpd-exon3-2f   | AGAGTCTCCAAATGACGGAC     |
| mHpd-exon3-2r   | TACATCTTGAACCAGCTAG      |
| mHpd-exon4-1f   | CTAGAACACGTGGTCCAGGGATC  |
| mHpd-exon4-1r   | GGCATTAGCTATCCCCATTTTGC  |
| mHpd-exon4-2f   | CAGAGGTGCCATAGAGCATG     |
| mHpd-exon4-2r   | CAGGGCAGACACACAGAAAG     |
| mHpd-Exon6-1f   | CCAGGTGACAAAGGATCCAGCTG  |
| mHpd-Exon6-1r   | GTA ACTCCCAGAAGCCTCTGTGT |
| mHpd-Exon6-2f   | CTTATATTAGGACTACCCAG     |
| mHpd-Exon6-2r   | CATTCTCAAAGGTCAGGCTT     |
| mHpd-exon7-1f   | CTGAGTTAGGGTCAGCTTCATGG  |
| mHpd-exon7-1r   | AAATGACGGAGCTGCCTGTGAAC  |
| mHpd-exon7-2f   | TAGAGAAGAGTGGGGGCTTT     |
| mHpd-exon7-2r   | GTTTCCCACCAGATGCTTAC     |
| mHpd-exon8-1f   | CATCAGGGCCTAATACGCCATCT  |
| mHpd-exon8-1r   | GTTCTCTGGCCTCCCAACATGTG  |
| mHpd-exon8-2f   | TATAGGTAAAGGGTTCATGG     |
| mHpd-exon8-2r   | CATATAATAAGCACACAGCC     |
| mHpd-exon9-1f   | TGAGGATCCTGTGTAACGGGTGT  |
| mHpd-exon9-1r   | GTTTGTGGGAGAGGAAAGGGACG  |
| mHpd-exon9-2f   | GAAGAGGGTGGGAAGGTCTC     |
| mHpd-exon9-2r   | CGCTACTCTCATCGGCAGAG     |
| mHpd-exon10-1f  | CTATAAGTGAGAGCCATCACTAG  |
| mHpd-exon10-1r  | TCTCCTATAGATTTTCAAGTAAAG |
| mHpd-exon10-2f  | TATCCTGACAGAACGTGGAT     |
| mHpd-exon10-2r  | TCAAGTGGTCTGCTGTAAC      |
| mHpd-exon11-1f  | AACTTTCCAAGGCTCCCAACAAG  |
| mHpd-exon11-1r  | GGCAAGGCGGACTCTTGTAATAG  |
| mHpd-exon11-2f  | CAAGGTCCAGTTTACCTTCC     |
| mHpd-exon11-2r  | TGGGTGGAGCCCTGAGGTTC     |
| mTyr-1f         | AACAGGCTGAGAGTATTTGATGT  |

|                          |                                                                                        |
|--------------------------|----------------------------------------------------------------------------------------|
| mTyr-1r                  | ATTTTCTGCCCTGAGATATTATC                                                                |
| mTyr-2f                  | GTTGCTGGAAAAGAAGTCTG                                                                   |
| mTyr-2r                  | TGCTGAAGTACCAGTCTTTG                                                                   |
| Un1Cas12f1-Tyr-1f        | GAATTC                      NNNNNN                      GGATCC<br>TAAGTTTGGATTTGGGGGCC |
| Un1Cas12f1-Tyr-1r        | TGATATCATTAACATGGGT                                                                    |
| Un1Cas12f1-Tyr-2f        | GAATTC                      NNNNNN                      GGATCC<br>CAGAGAAGCGAGTCTTGATT |
| Un1Cas12f1-Tyr-2r        | GCATCCATACAAAGAGGTCTG                                                                  |
| Un1Cas12f1-Fah-1f        | GAATTC                      NNNNNN                      GGATCC<br>CTACTTGGTACCCCACGCAG |
| Un1Cas12f1-Fah-1r        | GGACTCTGAGGTATGCAAT                                                                    |
| CjCas9-Fah-1f            | GAATTC                      NNNNNN                      GGATCC<br>TAGAGCATGCCAGGAAGATG |
| CjCas9-Fah-1r            | TCACCCTTGCCCCAACCTAC                                                                   |
| Un1Cas12f1-Hpd-site12-1f | GAAATTAATACGACTCACTATAGG                      G<br>ACCGCTTCACTTAGAGTGA                 |
| Un1Cas12f1-Hpd-site12-1r | CTCACCGTCTGCAGCACAG GTTGCATTCTTTCTTTGT                                                 |
| Un1Cas12f1-Tyr-site18-1r | CTTTTCGGAGACACTCAAAT GTTGCATTCTTTCTTTGT                                                |
| Un1Cas12f1-Tyr-site25-1r | TCCCCACAGGCACCTATGGC<br>GTTGCATTCTTTCTTTGT                                             |

**Table S7. Potential off-target sites of Hpd in the mouse genome.**

| No.                    | sequences (5'-3')                 | Primer sequences (5'-3')                                                                 |
|------------------------|-----------------------------------|------------------------------------------------------------------------------------------|
| Un1Cas12f1<br>-Hpd-OT1 | TTTG<br>CTaTGCTGCAGAtGGcaAG<br>T  | 1f: CTGGGCACAGTTCATACTTCAG                                                               |
|                        |                                   | 1r: TCCTCCTTCTCCTTATCCTCCT<br>2f: CTAGAAACCGCTGGATCAAAG<br>2r: TCTGCCTCCTGAGTGCTAGATT    |
| Un1Cas12f1<br>-Hpd-OT2 | TTTG<br>gTGTGCccCAGAtGGTGA<br>GT  | 1f: ACTGTTAGGGAAGAGGAAGACG                                                               |
|                        |                                   | 1r: CATTAACTTCCCCAAGTGATGG<br>2f: AGTCCCCGTGAGGATGAGAT<br>2r: GACTTAAGGCTTTGGGAGATCA     |
| Un1Cas12f1<br>-Hpd-OT3 | TTTG<br>CTGTGCTGCACcACccTGg<br>GT | 1f: CCTCACCTTCATGTTTATCCT                                                                |
|                        |                                   | 1r: CTTTGAAAAGAGGTCCTTTTGG<br>2f: TGACATCCATACGTTTGTTCATC<br>2r: AAGCCTATCTGGACACAAGATCA |
| Un1Cas12f1<br>-Hpd-OT4 | TTTG<br>CTGTGtTGgAtACaGTGAG<br>T  | 1f: GCACCTGGTTCCTCTGTAAACT                                                               |
|                        |                                   | 1r: AAAATGACTGTCCCCAAAGGTA<br>2f: ATGCTGTTGGCCATGTTGATAC<br>2r: CAAAACCCACTGATAGGAAAGC   |
| Un1Cas12f1             | TTTG                              | 1f: TTTTCCCCCTAGTTTCACTCC                                                                |

|                         |                                    |                                                                                                                                 |
|-------------------------|------------------------------------|---------------------------------------------------------------------------------------------------------------------------------|
| -Hpd-OT5                | CTGTGCTGtgtACtGTGAG<br>T           | 1r: CACTCAAAGGAAGCTTCACAAA<br>2f: GCGCGCTTAATCTAATTTCTTC<br>2r: TCCAGGAGATTTGGAAATCAGT                                          |
| Un1Cas12f1<br>-Hpd-OT6  | TTTG<br>CTGTGgTGgAGAtGGTgTg<br>T   | 1f: AGCCTCTTTGCTCATTTCATAGG<br>1r: AGACAGGGAATGCCACATTAAG<br>2f: CCTCCCCACTACAGACTACAT<br>2r: GGGTCTGGTATAGGTTTTTGAGA           |
| Un1Cas12f1<br>-Hpd-OT7  | TTTA<br>CTGTGaTGCAGACttgGAG<br>T   | 1f: TGGGGACAGGAAACATCTACTT<br>1r: GATTCTCCCGGTAAGTTTTTC<br>2f: TTGGTGTAGAGATGGGGAAGT<br>2r: CCAGTAAGTACCCACAATGAAGC             |
| Un1Cas12f1<br>-Hpd-OT8  | TTTG<br>CTtTcCTGCAGACGGgGAa<br>T   | 1f: GATTAGCAACTTTACACCCAGGA<br>1r: TGTCTTGTGGTGTGTGTCTG<br>2f: CAGTGAATTTTGCAAAGTGAGG<br>2r: TGTAAAGCCATCAGTATGTGCT             |
| Un1Cas12f1<br>-Hpd-OT9  | TTTG<br>CTtTGCTGCAaACaGTGA<br>Ga   | 1f: CATGGGGAAGCCTATCTTACAG<br>1r: CAGTTTGGGATGGAGTCTTTA<br>2f: AACCCATTCAATTTGTACAGCA<br>2r: TAGGGAAAGAATGGAAGATGGA             |
| Un1Cas12f1<br>-Hpd-OT10 | TTTA<br>CTGaGtTGCAGACtGTgTg<br>T   | 1f:<br>GATAGAGGAAGAAGAGTGTGTGT<br>G<br>1r: AGCCTGTGAAGGCTCACATCTA<br>2f: TTCGAATACAGCTTATACCATTGC<br>2r: CTGGTCTCTCCTCTTTGGTGAT |
| CjCas9-<br>Hpd-OT1      | GGagagGAGAGCAGAGCA<br>GAGATATAATAC | 1f: AACCAAGATAGGGATGCTTTGC<br>1r:<br>CAGCCACACAGATAGATAGTCAC<br>A<br>2f: AAGGAAGTTAGGCATGGTGTAC<br>2r: TATAGACACAGACACACATGCA   |
| CjCas9-<br>Hpd-OT2      | GGGATTtcGAGCAGgcCA<br>GAGAGCTGGTAC | 1f: TTCCATATTTTTGCCATTTGGT<br>1r: AGCCTTCTGTGAATAACAAGTGA<br>2f: TGTTTGTCTAGGTTTTTGACCA<br>2r: AGGACCCCAAGTTTGAAGCTA            |
| CjCas9-<br>Hpd-OT3      | GGGAcTGAGAGCtGAGCt<br>GAcAAAGGATAC | 1f: TCACATTCTGTCTAGAGCTTGG<br>1r: GATGACGAGGTTGTTTCAGTGG<br>2f: CAACTGGGAGCCTTGAAAATAC<br>2r: TGAGGCAGGAGGATAGCATAGT            |
| CjCas9-<br>Hpd-OT4      | GGcAgTGAGAGCAaAGaA<br>GAGAGAAGACAC | 1f: TGCACACAAGATAGAGGCAACT<br>1r: CAGGCCAATAGGGAATTTCTAA<br>2f: CCAGTCATGTGTGTCAAGTGTG<br>2r: AGTCTGACTGTCTCCCCACTGT            |
| CjCas9-                 | GGGATTtagGAGCAGAGgA                | 1f: ACAAGAATATGGCCACAGAAT                                                                                                       |

|                             |                                    |                             |
|-----------------------------|------------------------------------|-----------------------------|
| Hpd-OT5                     | GgGAAGGAATAC                       | 1r: TGTCTGCACAATTACAACAGAAA |
|                             |                                    | 2f: CATAGGCCTGAACTGGATTCTC  |
|                             |                                    | 2r: CCTTCATGTTCCCTATCCCAGAC |
| CjCas9-<br>Hpd-OT6          | GGGgaTGAGAGgcGAGCA<br>GAGACCAGGCAC | 1f: GGAAACAAAAGCCTGTACCTTG  |
|                             |                                    | 1r: GGGACAGTGTCTTCTCCCATAC  |
|                             |                                    | 2f: AAAGCTGCAGATGGAACCAC    |
| 2r: TTCCTGAAGGTCATGTCCATTTT |                                    |                             |
| CjCas9-<br>Hpd-OT7          | GtGAcTGtAGCAGAGCAG<br>AGATTCAGTAC  | 1f: TACAAGAGGGCCACTCACCTAT  |
|                             |                                    | 1r: GGGGACAGGGTCTCACTATGTA  |
|                             |                                    | 2f: GGAAGGCAGCTGTTAGAACCTA  |
| 2r: GTCTCTGCCTCCTGAGTGCT    |                                    |                             |
| CjCas9-<br>Hpd-OT8          | GGGgTTGAGgGtAaAGCA<br>GAGAGAACACAC | 1f: CAGAGAACCAGGCTGAAACACT  |
|                             |                                    | 1r: GATGGTCATATAGTTGCGGAAA  |
|                             |                                    | 2f: CTGTCACCCACAGTAAGAGCAC  |
| 2r: TGCTCTGAATGAGTGGCATATC  |                                    |                             |
| CjCas9-<br>Hpd-OT9          | GGGAaaGAGAGCAGAGC<br>catGATGGAACAC | 1f: TAGGAAGGTAGAGAGCCACTGC  |
|                             |                                    | 1r: ATCAGAGAGGCATAGCAGGAAG  |
|                             |                                    | 2f: AGATGCAAGTCACCTGAGAAGC  |
| 2r: AGAGTCTTCCTCCCTGGATTTT  |                                    |                             |
| CjCas9-<br>Hpd-OT10         | GGGATTGAaAtCAGgtCAtA<br>GACTTGGCAC | 1f: ATAAAACAGCACCAGCCCTAAA  |
|                             |                                    | 1r: CTTTAGTCAAGGAAAAACCAGCA |
|                             |                                    | 2f: CCTACAGAACAAAACCCAGCTC  |
| 2r: GGCCCAACATAATCAAGTTGTAA |                                    |                             |
